# Supplementary material for: Data Types and the Phylogeny of Neoaves
Source: Preprints.org preprint supplement (doi:10.20944/preprints202011.0423.v1), 2020-11-16
Supplement: Supplementary file 1 [file Supplementary_File_S1.xlsx]

## Sheet: Sites per locus
#	Filename	Exon	c1	c2	c3		Total NC	Intron	UTR	Intergenic		Total
1	prum-alignment-L1.longname.annotEB.wCODON.nex	1402	467	468	467		192	192				1594
2	prum-alignment-L2.longname.annotEB.wCODON.nex	1542	514	514	514		218	218				1760
3	prum-alignment-L3.longname.annotEB.wCODON.nex	1446	482	482	482		187	80	107			1633
4	prum-alignment-L4.longname.annotEB.wCODON.nex	1445	481	482	482		48	48				1493
5	prum-alignment-L5.longname.annotEB.wCODON.nex	1553	518	518	517		81	81				1634
6	prum-alignment-L6.longname.annotEB.wCODON.nex	1518	506	506	506		164	164				1682
7	prum-alignment-L7.longname.annotEB.wCODON.nex	865	288	289	288		167	167				1032
8	prum-alignment-L8.longname.annotEB.wCODON.nex	930	310	310	310		556		556			1486
9	prum-alignment-L9.longname.annotEB.wCODON.nex	1485	495	495	495		203	203				1688
10	prum-alignment-L10.longname.annotEB.wCODON.nex	801	267	267	267		392	392				1193
11	prum-alignment-L11.longname.annotEB.wCODON.nex	1341	447	447	447		441	441				1782
12	prum-alignment-L12.longname.annotEB.wCODON.nex	1338	446	446	446		319	117	202			1657
21	prum-alignment-L21.longname.annotEB.wCODON.nex	785	261	262	262		105	101	4			890
22	prum-alignment-L22.longname.annotEB.wCODON.nex	1525	509	508	508		181	181				1706
24	prum-alignment-L24.longname.annotEB.wCODON.nex	1523	508	508	507		166	166				1689
27	prum-alignment-L27.longname.annotEB.wCODON.nex	826	276	275	275		182	129	53			1008
28	prum-alignment-L28.longname.annotEB.wCODON.nex	1257	419	419	419		346	186	160			1603
30	prum-alignment-L30.longname.annotEB.wCODON.nex	1340	446	447	447		340		340			1680
31	prum-alignment-L31.longname.annotEB.wCODON.nex	1554	518	518	518		189	189				1743
32	prum-alignment-L32.longname.annotEB.wCODON.nex	1235	411	412	412		174	157	17			1409
34	prum-alignment-L34.longname.annotEB.wCODON.nex	1517	506	506	505		100	100				1617
35	prum-alignment-L35.longname.annotEB.wCODON.nex	1718	573	573	572							1718
36	prum-alignment-L36.longname.annotEB.wCODON.nex	801	267	267	267		548	548				1349
37	prum-alignment-L37.longname.annotEB.wCODON.nex	1555	519	518	518		67	67				1622
38	prum-alignment-L38.longname.annotEB.wCODON.nex	1465	489	488	488		208	130	78			1673
39	prum-alignment-L39.longname.annotEB.wCODON.nex	1549	516	516	517		87		87			1636
41	prum-alignment-L41.longname.annotEB.wCODON.nex	1505	501	502	502		170	46	124			1675
42	prum-alignment-L42.longname.annotEB.wCODON.nex	1378	459	460	459		151	151				1529
43	prum-alignment-L43.longname.annotEB.wCODON.nex	1461	487	487	487		191		191			1652
44	prum-alignment-L44.longname.annotEB.wCODON.nex	1479	493	493	493		157		157			1636
48	prum-alignment-L48.longname.annotEB.wCODON.nex	1395	465	465	465		223	223				1618
49	prum-alignment-L49.longname.annotEB.wCODON.nex	1517	506	505	506		92	92				1609
50	prum-alignment-L50.longname.annotEB.wCODON.nex	1448	483	482	483		118	118				1566
51	prum-alignment-L51.longname.annotEB.wCODON.nex	279	93	93	93		330	330				609
53	prum-alignment-L53.longname.annotEB.wCODON.nex	1433	477	478	478		227	227				1660
54	prum-alignment-L54.longname.annotEB.wCODON.nex	1378	460	459	459		123	123				1501
57	prum-alignment-L57.longname.annotEB.wCODON.nex	195	65	65	65		671	189	482			866
58	prum-alignment-L58.longname.annotEB.wCODON.nex	1544	514	515	515		190	190				1734
59	prum-alignment-L59.longname.annotEB.wCODON.nex	1598	532	533	533		219	219				1817
61	prum-alignment-L61.longname.annotEB.wCODON.nex	1262	421	420	421		78	78				1340
62	prum-alignment-L62.longname.annotEB.wCODON.nex	1726	575	576	575							1726
63	prum-alignment-L63.longname.annotEB.wCODON.nex	1213	405	404	404		426	426				1639
64	prum-alignment-L64.longname.annotEB.wCODON.nex	1608	536	536	536		96	96				1704
65	prum-alignment-L65.longname.annotEB.wCODON.nex	1125	375	375	375		501	501				1626
67	prum-alignment-L67.longname.annotEB.wCODON.nex	1125	375	375	375		598	598				1723
72	prum-alignment-L72.longname.annotEB.wCODON.nex	1254	418	418	418		177	15	162			1431
73	prum-alignment-L73.longname.annotEB.wCODON.nex	1050	350	350	350		287		287			1337
74	prum-alignment-L74.longname.annotEB.wCODON.nex	613	205	204	204		482	482				1095
75	prum-alignment-L75.longname.annotEB.wCODON.nex	1543	514	514	515							1543
76	prum-alignment-L76.longname.annotEB.wCODON.nex	1282	427	427	428		178	178				1460
77	prum-alignment-L77.longname.annotEB.wCODON.nex	943	314	314	315		390		390			1333
78	prum-alignment-L78.longname.annotEB.wCODON.nex	1095	365	365	365		181		181			1276
79	prum-alignment-L79.longname.annotEB.wCODON.nex	1259	420	420	419		308	167	141			1567
80	prum-alignment-L80.longname.annotEB.wCODON.nex	1298	433	432	433							1298
81	prum-alignment-L81.longname.annotEB.wCODON.nex	1598	533	532	533							1598
82	prum-alignment-L82.longname.annotEB.wCODON.nex	1095	365	365	365		594		594			1689
85	prum-alignment-L85.longname.annotEB.wCODON.nex	1728	576	576	576							1728
86	prum-alignment-L86.longname.annotEB.wCODON.nex	1540	513	513	514		207		207			1747
87	prum-alignment-L87.longname.annotEB.wCODON.nex	1608	536	536	536		194	194				1802
88	prum-alignment-L88.longname.annotEB.wCODON.nex	1206	402	402	402		458		458			1664
89	prum-alignment-L89.longname.annotEB.wCODON.nex	1207	403	402	402		218	179	39			1425
91	prum-alignment-L91.longname.annotEB.wCODON.nex	1680	560	560	560		58		58			1738
94	prum-alignment-L94.longname.annotEB.wCODON.nex	754	252	251	251		92	91	1			846
95	prum-alignment-L95.longname.annotEB.wCODON.nex	1090	363	363	364		361	176	185			1451
98	prum-alignment-L98.longname.annotEB.wCODON.nex	1765	589	588	588							1765
99	prum-alignment-L99.longname.annotEB.wCODON.nex	1560	520	520	520		148		148			1708
100	prum-alignment-L100.longname.annotEB.wCODON.nex	1418	472	473	473							1418
102	prum-alignment-L102.longname.annotEB.wCODON.nex	1092	364	364	364		259	259				1351
103	prum-alignment-L103.longname.annotEB.wCODON.nex	1388	462	463	463		298	152	146			1686
104	prum-alignment-L104.longname.annotEB.wCODON.nex	1557	519	519	519		172		172			1729
105	prum-alignment-L105.longname.annotEB.wCODON.nex	1419	473	473	473		42	42				1461
107	prum-alignment-L107.longname.annotEB.wCODON.nex	1702	568	567	567							1702
108	prum-alignment-L108.longname.annotEB.wCODON.nex	1514	505	505	504		186	186				1700
110	prum-alignment-L110.longname.annotEB.wCODON.nex	1041	347	347	347		331	331				1372
111	prum-alignment-L111.longname.annotEB.wCODON.nex	1337	445	446	446		1		1			1338
113	prum-alignment-L113.longname.annotEB.wCODON.nex	1560	520	520	520		397	397				1957
116	prum-alignment-L116.longname.annotEB.wCODON.nex	1335	445	445	445		41		41			1376
118	prum-alignment-L118.longname.annotEB.wCODON.nex	334	112	111	111		680	170	510			1014
119	prum-alignment-L119.longname.annotEB.wCODON.nex	1410	470	470	470		173		173			1583
120	prum-alignment-L120.longname.annotEB.wCODON.nex	1187	395	396	396		388	202	186			1575
121	prum-alignment-L121.longname.annotEB.wCODON.nex	1698	566	566	566		239	239				1937
122	prum-alignment-L122.longname.annotEB.wCODON.nex	1616	539	538	539		330	330				1946
125	prum-alignment-L125.longname.annotEB.wCODON.nex	1503	501	501	501		140	108	32			1643
126	prum-alignment-L126.longname.annotEB.wCODON.nex	1399	466	466	467		268	148	120			1667
127	prum-alignment-L127.longname.annotEB.wCODON.nex	1726	575	576	575							1726
128	prum-alignment-L128.longname.annotEB.wCODON.nex	875	292	292	291		444	444				1319
129	prum-alignment-L129.longname.annotEB.wCODON.nex	1407	469	469	469		238	238				1645
130	prum-alignment-L130.longname.annotEB.wCODON.nex	1572	524	524	524		198	198				1770
131	prum-alignment-L131.longname.annotEB.wCODON.nex	1028	343	343	342		105	105				1133
133	prum-alignment-L133.longname.annotEB.wCODON.nex	1565	522	522	521							1565
134	prum-alignment-L134.longname.annotEB.wCODON.nex	1416	472	472	472		155	155				1571
135	prum-alignment-L135.longname.annotEB.wCODON.nex	1541	514	514	513		87	87				1628
136	prum-alignment-L136.longname.annotEB.wCODON.nex	1701	567	567	567		357	357				2058
137	prum-alignment-L137.longname.annotEB.wCODON.nex	1174	391	392	391		363	363				1537
141	prum-alignment-L141.longname.annotEB.wCODON.nex	728	242	243	243		474	190	284			1202
142	prum-alignment-L142.longname.annotEB.wCODON.nex	1541	513	514	514		184		184			1725
143	prum-alignment-L143.longname.annotEB.wCODON.nex	294	98	98	98		1291	184	1107			1585
145	prum-alignment-L145.longname.annotEB.wCODON.nex	1570	523	523	524		135	135				1705
146	prum-alignment-L146.longname.annotEB.wCODON.nex	1788	596	596	596							1788
147	prum-alignment-L147.longname.annotEB.wCODON.nex	1497	499	499	499		139	139				1636
148	prum-alignment-L148.longname.annotEB.wCODON.nex	931	310	311	310		398	398				1329
149	prum-alignment-L149.longname.annotEB.wCODON.nex	1642	548	547	547		165	165				1807
150	prum-alignment-L150.longname.annotEB.wCODON.nex	1855	619	618	618							1855
151	prum-alignment-L151.longname.annotEB.wCODON.nex	1711	570	571	570							1711
152	prum-alignment-L152.longname.annotEB.wCODON.nex	1065	355	355	355		369		369			1434
153	prum-alignment-L153.longname.annotEB.wCODON.nex	908	302	303	303		1195	1195				2103
154	prum-alignment-L154.longname.annotEB.wCODON.nex	1568	523	523	522		119		119			1687
155	prum-alignment-L155.longname.annotEB.wCODON.nex	1550	517	516	517		123	123				1673
157	prum-alignment-L157.longname.annotEB.wCODON.nex	1329	443	443	443		205	205				1534
158	prum-alignment-L158.longname.annotEB.wCODON.nex	1787	596	595	596							1787
159	prum-alignment-L159.longname.annotEB.wCODON.nex	1280	426	427	427							1280
161	prum-alignment-L161.longname.annotEB.wCODON.nex	1651	551	550	550		313	313				1964
162	prum-alignment-L162.longname.annotEB.wCODON.nex	1179	393	393	393		355	184	171			1534
163	prum-alignment-L163.longname.annotEB.wCODON.nex	1062	354	354	354		12	9	3			1074
165	prum-alignment-L165.longname.annotEB.wCODON.nex	628	210	209	209		856	60	796			1484
169	prum-alignment-L169.longname.annotEB.wCODON.nex	1110	370	370	370		670		670			1780
170	prum-alignment-L170.longname.annotEB.wCODON.nex	1554	518	518	518		221	221				1775
171	prum-alignment-L171.longname.annotEB.wCODON.nex	1593	531	531	531		397	397				1990
175	prum-alignment-L175.longname.annotEB.wCODON.nex	1729	577	576	576							1729
176	prum-alignment-L176.longname.annotEB.wCODON.nex	1649	549	550	550		260	142	118			1909
177	prum-alignment-L177.longname.annotEB.wCODON.nex	1551	517	517	517		171	171				1722
178	prum-alignment-L178.longname.annotEB.wCODON.nex	1710	570	570	570							1710
180	prum-alignment-L180.longname.annotEB.wCODON.nex	1537	512	513	512		149	149				1686
181	prum-alignment-L181.longname.annotEB.wCODON.nex	1666	555	556	555		138	138				1804
182	prum-alignment-L182.longname.annotEB.wCODON.nex	962	320	321	321		1027	116	911			1989
183	prum-alignment-L183.longname.annotEB.wCODON.nex	1208	402	403	403		156	156				1364
184	prum-alignment-L184.longname.annotEB.wCODON.nex	1386	462	462	462		198		198			1584
186	prum-alignment-L186.longname.annotEB.wCODON.nex	1464	488	488	488							1464
187	prum-alignment-L187.longname.annotEB.wCODON.nex	1447	482	482	483		219	155	64			1666
188	prum-alignment-L188.longname.annotEB.wCODON.nex	1230	410	410	410		303	166	137			1533
189	prum-alignment-L189.longname.annotEB.wCODON.nex	1371	457	457	457		519		519			1890
190	prum-alignment-L190.longname.annotEB.wCODON.nex	1440	480	480	480		218	113	105			1658
192	prum-alignment-L192.longname.annotEB.wCODON.nex	1048	349	349	350		312	312				1360
193	prum-alignment-L193.longname.annotEB.wCODON.nex	439	146	147	146		33	33				472
194	prum-alignment-L194.longname.annotEB.wCODON.nex	1775	591	592	592							1775
195	prum-alignment-L195.longname.annotEB.wCODON.nex	1531	510	510	511		186		186			1717
196	prum-alignment-L196.longname.annotEB.wCODON.nex	1520	507	506	507		179	179				1699
197	prum-alignment-L197.longname.annotEB.wCODON.nex	908	302	303	303		353	353				1261
201	prum-alignment-L201.longname.annotEB.wCODON.nex	896	299	298	299		164	164				1060
202	prum-alignment-L202.longname.annotEB.wCODON.nex	1552	517	517	518		146	146				1698
203	prum-alignment-L203.longname.annotEB.wCODON.nex	1913	638	637	638							1913
204	prum-alignment-L204.longname.annotEB.wCODON.nex	1850	616	617	617		176		176			2026
205	prum-alignment-L205.longname.annotEB.wCODON.nex	1416	472	472	472		271	271				1687
206	prum-alignment-L206.longname.annotEB.wCODON.nex	1511	503	504	504		96		96			1607
207	prum-alignment-L207.longname.annotEB.wCODON.nex	993	331	331	331		424	196	228			1417
208	prum-alignment-L208.longname.annotEB.wCODON.nex	387	129	129	129		63	63				450
209	prum-alignment-L209.longname.annotEB.wCODON.nex	621	207	207	207		464	180	284			1085
211	prum-alignment-L211.longname.annotEB.wCODON.nex	1328	442	443	443		354	354				1682
213	prum-alignment-L213.longname.annotEB.wCODON.nex	1893	631	631	631		420	221	199			2313
216	prum-alignment-L216.longname.annotEB.wCODON.nex	1677	559	559	559							1677
221	prum-alignment-L221.longname.annotEB.wCODON.nex	1771	591	590	590							1771
222	prum-alignment-L222.longname.annotEB.wCODON.nex	1259	419	420	420		405	203	202			1664
223	prum-alignment-L223.longname.annotEB.wCODON.nex	229	76	77	76		215	215				444
224	prum-alignment-L224.longname.annotEB.wCODON.nex	858	286	286	286		410	193	217			1268
225	prum-alignment-L225.longname.annotEB.wCODON.nex	571	190	190	191		397	205	192			968
226	prum-alignment-L226.longname.annotEB.wCODON.nex	1815	605	605	605							1815
228	prum-alignment-L228.longname.annotEB.wCODON.nex	1615	539	538	538		217	217				1832
229	prum-alignment-L229.longname.annotEB.wCODON.nex	1117	372	372	373		484	172	312			1601
230	prum-alignment-L230.longname.annotEB.wCODON.nex	1326	442	442	442		336	164	172			1662
231	prum-alignment-L231.longname.annotEB.wCODON.nex	820	273	273	274		687	161	526			1507
232	prum-alignment-L232.longname.annotEB.wCODON.nex	1744	582	581	581							1744
233	prum-alignment-L233.longname.annotEB.wCODON.nex	777	259	259	259		69	69				846
234	prum-alignment-L234.longname.annotEB.wCODON.nex	1458	486	486	486		227	227				1685
235	prum-alignment-L235.longname.annotEB.wCODON.nex	1394	464	465	465		299	145	154			1693
239	prum-alignment-L239.longname.annotEB.wCODON.nex	724	241	241	242		125	125				849
240	prum-alignment-L240.longname.annotEB.wCODON.nex	1466	488	489	489							1466
241	prum-alignment-L241.longname.annotEB.wCODON.nex	1576	526	525	525		161	161				1737
242	prum-alignment-L242.longname.annotEB.wCODON.nex	1095	365	365	365		305	305				1400
243	prum-alignment-L243.longname.annotEB.wCODON.nex	743	247	248	248		221	221				964
244	prum-alignment-L244.longname.annotEB.wCODON.nex	787	262	262	263		312		312			1099
245	prum-alignment-L245.longname.annotEB.wCODON.nex	1494	498	498	498		285	285				1779
246	prum-alignment-L246.longname.annotEB.wCODON.nex	1518	506	506	506		199	199				1717
247	prum-alignment-L247.longname.annotEB.wCODON.nex	1499	500	500	499		107	107				1606
248	prum-alignment-L248.longname.annotEB.wCODON.nex	1151	383	384	384		394	182	212			1545
249	prum-alignment-L249.longname.annotEB.wCODON.nex	773	257	258	258		214	82	132			987
250	prum-alignment-L250.longname.annotEB.wCODON.nex	1173	391	391	391		351	177	174			1524
251	prum-alignment-L251.longname.annotEB.wCODON.nex	1731	577	577	577							1731
252	prum-alignment-L252.longname.annotEB.wCODON.nex	1483	494	495	494		172	172				1655
253	prum-alignment-L253.longname.annotEB.wCODON.nex	1002	334	334	334		339		339			1341
255	prum-alignment-L255.longname.annotEB.wCODON.nex	1693	565	564	564							1693
256	prum-alignment-L256.longname.annotEB.wCODON.nex	1724	574	575	575							1724
257	prum-alignment-L257.longname.annotEB.wCODON.nex	1718	572	573	573							1718
258	prum-alignment-L258.longname.annotEB.wCODON.nex	1644	548	548	548		223	223				1867
260	prum-alignment-L260.longname.annotEB.wCODON.nex	1002	334	334	334		596	124	472			1598
261	prum-alignment-L261.longname.annotEB.wCODON.nex	1307	435	436	436		437	198	239			1744
262	prum-alignment-L262.longname.annotEB.wCODON.nex	1301	433	434	434		278	166	112			1579
264	prum-alignment-L264.longname.annotEB.wCODON.nex	1649	550	550	549		144		144			1793
265	prum-alignment-L265.longname.annotEB.wCODON.nex	124	41	42	41		415	415				539
266	prum-alignment-L266.longname.annotEB.wCODON.nex	1836	612	612	612		350	350				2186
267	prum-alignment-L267.longname.annotEB.wCODON.nex	1540	513	513	514		119	119				1659
269	prum-alignment-L269.longname.annotEB.wCODON.nex	1077	359	359	359		321	321				1398
270	prum-alignment-L270.longname.annotEB.wCODON.nex	1380	460	460	460		139	139				1519
271	prum-alignment-L271.longname.annotEB.wCODON.nex	1439	479	480	480		175	136	39			1614
272	prum-alignment-L272.longname.annotEB.wCODON.nex	493	164	165	164		71	71				564
275	prum-alignment-L275.longname.annotEB.wCODON.nex	497	165	166	166		711	506	205			1208
276	prum-alignment-L276.longname.annotEB.wCODON.nex	1660	553	554	553		24	24				1684
277	prum-alignment-L277.longname.annotEB.wCODON.nex	695	231	232	232		450	259	191			1145
279	prum-alignment-L279.longname.annotEB.wCODON.nex	604	201	201	202		262	262				866
280	prum-alignment-L280.longname.annotEB.wCODON.nex	1529	510	510	509							1529
281	prum-alignment-L281.longname.annotEB.wCODON.nex	1301	433	434	434		422	178	244			1723
282	prum-alignment-L282.longname.annotEB.wCODON.nex	1670	557	556	557		274	274				1944
288	prum-alignment-L288.longname.annotEB.wCODON.nex	1551	517	517	517		117		117			1668
289	prum-alignment-L289.longname.annotEB.wCODON.nex	1661	554	554	553							1661
290	prum-alignment-L290.longname.annotEB.wCODON.nex	1518	506	506	506		141	141				1659
292	prum-alignment-L292.longname.annotEB.wCODON.nex	1701	567	567	567							1701
293	prum-alignment-L293.longname.annotEB.wCODON.nex	1469	489	490	490		272	272				1741
294	prum-alignment-L294.longname.annotEB.wCODON.nex	1132	377	378	377		341	341				1473
295	prum-alignment-L295.longname.annotEB.wCODON.nex	1529	510	509	510		199	199				1728
296	prum-alignment-L296.longname.annotEB.wCODON.nex	1502	500	501	501		188	188				1690
297	prum-alignment-L297.longname.annotEB.wCODON.nex	1283	428	428	427		273	273				1556
298	prum-alignment-L298.longname.annotEB.wCODON.nex	1816	606	605	605		36		36			1852
301	prum-alignment-L301.longname.annotEB.wCODON.nex	683	227	228	228		31		31			714
302	prum-alignment-L302.longname.annotEB.wCODON.nex	740	246	247	247		123		123			863
303	prum-alignment-L303.longname.annotEB.wCODON.nex	1462	488	487	487		139		139			1601
305	prum-alignment-L305.longname.annotEB.wCODON.nex	752	250	251	251							752
306	prum-alignment-L306.longname.annotEB.wCODON.nex	1792	597	597	598							1792
307	prum-alignment-L307.longname.annotEB.wCODON.nex	906	302	302	302		233		233			1139
310	prum-alignment-L310.longname.annotEB.wCODON.nex	1555	518	518	519		125	125				1680
311	prum-alignment-L311.longname.annotEB.wCODON.nex	1278	426	426	426		497	497				1775
312	prum-alignment-L312.longname.annotEB.wCODON.nex	937	312	312	313		473	473				1410
314	prum-alignment-L314.longname.annotEB.wCODON.nex	1718	572	573	573							1718
315	prum-alignment-L315.longname.annotEB.wCODON.nex	1720	574	573	573							1720
316	prum-alignment-L316.longname.annotEB.wCODON.nex	1796	598	599	599							1796
317	prum-alignment-L317.longname.annotEB.wCODON.nex	791	263	264	264		638	638				1429
318	prum-alignment-L318.longname.annotEB.wCODON.nex	1099	366	367	366		331	331				1430
319	prum-alignment-L319.longname.annotEB.wCODON.nex	1509	503	503	503		104		104			1613
320	prum-alignment-L320.longname.annotEB.wCODON.nex	1342	447	448	447		291	291				1633
321	prum-alignment-L321.longname.annotEB.wCODON.nex	1511	503	504	504		243		243			1754
322	prum-alignment-L322.longname.annotEB.wCODON.nex	1706	568	569	569							1706
325	prum-alignment-L325.longname.annotEB.wCODON.nex	1541	514	514	513		184		184			1725
327	prum-alignment-L327.longname.annotEB.wCODON.nex	1396	465	466	465		145	145				1541
328	prum-alignment-L328.longname.annotEB.wCODON.nex	1675	559	558	558							1675
329	prum-alignment-L329.longname.annotEB.wCODON.nex	1751	584	584	583							1751
330	prum-alignment-L330.longname.annotEB.wCODON.nex	1411	470	470	471		227		227			1638
331	prum-alignment-L331.longname.annotEB.wCODON.nex	1102	367	367	368		95		95			1197
333	prum-alignment-L333.longname.annotEB.wCODON.nex	1699	566	567	566							1699
334	prum-alignment-L334.longname.annotEB.wCODON.nex	980	326	327	327		188	188				1168
335	prum-alignment-L335.longname.annotEB.wCODON.nex	1547	516	516	515		136	136				1683
336	prum-alignment-L336.longname.annotEB.wCODON.nex	1144	381	381	382		304	129	175			1448
337	prum-alignment-L337.longname.annotEB.wCODON.nex	1619	539	540	540							1619
338	prum-alignment-L338.longname.annotEB.wCODON.nex	1761	587	587	587		162	162				1923
339	prum-alignment-L339.longname.annotEB.wCODON.nex	1258	419	419	420		40	21	19			1298
340	prum-alignment-L340.longname.annotEB.wCODON.nex	1556	519	519	518		104		104			1660
341	prum-alignment-L341.longname.annotEB.wCODON.nex	1506	502	502	502		222	222				1728
342	prum-alignment-L342.longname.annotEB.wCODON.nex	1737	579	579	579							1737
343	prum-alignment-L343.longname.annotEB.wCODON.nex	1107	369	369	369		282	90	192			1389
346	prum-alignment-L346.longname.annotEB.wCODON.nex	1499	500	500	499		78	78				1577
347	prum-alignment-L347.longname.annotEB.wCODON.nex	1175	391	392	392		491	178	313			1666
348	prum-alignment-L348.longname.annotEB.wCODON.nex	1082	361	361	360		5	5				1087
349	prum-alignment-L349.longname.annotEB.wCODON.nex	361	121	120	120							361
115	prum-alignment-L115.longname.annotEB.noncoding.nex						733			733		733
174	prum-alignment-L174.longname.annotEB.noncoding.nex						901	901				901
210	prum-alignment-L210.longname.annotEB.noncoding.nex						1404	1404				1404
214	prum-alignment-L214.longname.annotEB.noncoding.nex						1628			1628		1628
215	prum-alignment-L215.longname.annotEB.noncoding.nex						1172	1172				1172
217	prum-alignment-L217.longname.annotEB.noncoding.nex						937	937				937
219	prum-alignment-L219.longname.annotEB.noncoding.nex						724	724				724
237	prum-alignment-L237.longname.annotEB.noncoding.nex						821	821				821
344	prum-alignment-L344.longname.annotEB.noncoding.nex						960			960		960

## Sheet: Exon
#	Alignment Name	c1 A	c1 C	c1 G	c1 T	c1 # sites	c1 %GC		c2 A	c2 C	c2 G	c2 T	c2 # sites	c2 %GC		c3 A	c3 C	c3 G	c3 T	c3 # sites	c3 %GC		c1 nchar	c1 inf	c2 nchar	c2 inf	c3 nchar	c3 inf		c1 %inf	c2 %inf	c3 %inf
1	prum-alignment-L1	0.29776	0.29472	0.23065	0.17688	463.6	0.52537		0.31117	0.30826	0.16076	0.21981	464.64	0.46902		0.14432	0.41268	0.26848	0.17452	463.11	0.68116		467	77	468	35	467	348		0.164882	0.0747863	0.745182
2	prum-alignment-L2	0.34402	0.20292	0.2798	0.17326	511.31	0.48272		0.31904	0.29357	0.16185	0.22554	511.45	0.45542		0.22265	0.32526	0.19344	0.25865	511.12	0.5187		514	71	514	31	514	410		0.138132	0.0603113	0.797665
3	prum-alignment-L3	0.33717	0.27294	0.26711	0.12279	472.43	0.54005		0.40905	0.1901	0.18654	0.21431	472.45	0.37664		0.22838	0.23505	0.29679	0.23978	472.18	0.53184		482	120	482	95	482	389		0.248963	0.197095	0.807054
4	prum-alignment-L4	0.24579	0.35987	0.24991	0.14443	474.26	0.60978		0.26851	0.36985	0.14544	0.2162	475.12	0.51529		0.12324	0.37437	0.33882	0.16358	474.82	0.71319		481	133	482	43	482	430		0.276507	0.0892116	0.892116
5	prum-alignment-L5	0.28024	0.22104	0.27052	0.2282	512.23	0.49156		0.41049	0.18458	0.16232	0.24262	512.21	0.3469		0.31063	0.17626	0.21046	0.30265	511.19	0.38672		518	149	518	114	517	490		0.287645	0.220077	0.947776
6	prum-alignment-L6	0.25919	0.29844	0.26291	0.17945	502.33	0.56135		0.27411	0.32858	0.15269	0.24461	502.38	0.48127		0.21504	0.28006	0.29206	0.21284	502.25	0.57212		506	197	506	114	506	437		0.389328	0.225296	0.863636
7	prum-alignment-L7	0.26101	0.27605	0.27366	0.18929	286.51	0.54971		0.32197	0.31031	0.19344	0.17429	287.45	0.50375		0.24982	0.19904	0.26751	0.28362	286.44	0.46655		288	60	289	29	288	270		0.208333	0.100346	0.9375
8	prum-alignment-L8	0.34864	0.26709	0.26386	0.12041	309.89	0.53095		0.34301	0.27717	0.13586	0.24396	309.93	0.41303		0.14142	0.38973	0.35291	0.11593	309.79	0.74264		310	46	310	26	310	230		0.148387	0.083871	0.741935
9	prum-alignment-L9	0.3115	0.16857	0.34658	0.17335	488.72	0.51515		0.39961	0.24868	0.18256	0.16914	488.76	0.43124		0.29771	0.14377	0.20324	0.35528	488.56	0.34701		495	171	495	144	495	393		0.345455	0.290909	0.793939
10	prum-alignment-L10	0.29803	0.16329	0.32298	0.21571	266.59	0.48627		0.37321	0.21709	0.16258	0.24712	266.59	0.37967		0.21073	0.28362	0.23546	0.2702	266.47	0.51908		267	34	267	8	267	229		0.127341	0.0299625	0.857678
11	prum-alignment-L11	0.30841	0.19447	0.27028	0.22684	433.77	0.46475		0.39581	0.20455	0.18771	0.21193	433.82	0.39226		0.30919	0.15747	0.19159	0.34175	433.72	0.34906		447	110	447	50	447	373		0.246085	0.111857	0.834452
12	prum-alignment-L12	0.37726	0.20303	0.27475	0.14496	444.88	0.47778		0.31197	0.25	0.241	0.19703	444.87	0.491		0.31061	0.23191	0.19072	0.26677	444.69	0.42263		446	83	446	36	446	407		0.186099	0.0807175	0.912556
21	prum-alignment-L21	0.26015	0.213	0.33616	0.19069	258.75	0.54916		0.31276	0.22991	0.18689	0.27044	259.83	0.4168		0.03376	0.54394	0.35563	0.06667	259.65	0.89957		261	68	262	36	262	221		0.260536	0.137405	0.843511
22	prum-alignment-L22	0.24429	0.35708	0.28538	0.11325	505.45	0.64246		0.25095	0.31106	0.20156	0.23643	504.52	0.51262		0.12208	0.31357	0.35745	0.20689	504.34	0.67102		509	85	508	25	508	412		0.166994	0.0492126	0.811024
24	prum-alignment-L24	0.31267	0.26045	0.32361	0.10327	503.5	0.58406		0.34497	0.2745	0.26785	0.11268	503.37	0.54235		0.32876	0.17783	0.2368	0.25662	502.16	0.41463		508	148	508	113	507	493		0.291339	0.222441	0.972387
27	prum-alignment-L27	0.31807	0.26329	0.27922	0.13942	274.9	0.54251		0.34055	0.21419	0.153	0.29226	273.9	0.36719		0.26745	0.21833	0.29279	0.22143	273.81	0.51112		276	92	275	42	275	263		0.333333	0.152727	0.956364
28	prum-alignment-L28	0.33247	0.23687	0.22089	0.20977	415.88	0.45776		0.33889	0.19984	0.19038	0.27089	415.88	0.39022		0.23858	0.27243	0.19859	0.2904	415.74	0.47102		419	103	419	71	419	371		0.245823	0.169451	0.885442
30	prum-alignment-L30	0.31076	0.21485	0.25767	0.21671	444.3	0.47252		0.34837	0.26065	0.15023	0.24075	445.16	0.41088		0.27944	0.20072	0.21661	0.30323	445.16	0.41733		446	90	447	47	447	333		0.201794	0.105145	0.744966
31	prum-alignment-L31	0.31	0.23246	0.28321	0.17433	515.25	0.51567		0.37261	0.26661	0.14915	0.21163	515.31	0.41576		0.33766	0.12254	0.21865	0.32115	515.21	0.34119		518	150	518	110	518	478		0.289575	0.212355	0.92278
32	prum-alignment-L32	0.23281	0.24698	0.28347	0.23674	408.06	0.53045		0.19319	0.26439	0.19443	0.34799	409.12	0.45882		0.08763	0.49706	0.27031	0.145	408.88	0.76737		411	232	412	149	412	378		0.564477	0.36165	0.917476
34	prum-alignment-L34	0.31374	0.20201	0.28353	0.20072	503.87	0.48554		0.29529	0.30288	0.15862	0.2432	503.89	0.4615		0.25093	0.24884	0.21137	0.28886	502.77	0.46021		506	214	506	172	505	473		0.422925	0.339921	0.936634
35	prum-alignment-L35	0.27869	0.20233	0.27645	0.24253	568.09	0.47878		0.28128	0.20784	0.17984	0.33105	568.12	0.38768		0.24599	0.21338	0.21132	0.32932	567.04	0.4247		573	102	573	65	572	517		0.17801	0.113438	0.903846
36	prum-alignment-L36	0.18342	0.36679	0.23277	0.21702	264.96	0.59956		0.15278	0.60583	0.08027	0.16112	265.37	0.6861		0.2112	0.22808	0.18343	0.37729	265.04	0.41151		267	64	267	41	267	146		0.2397	0.153558	0.546816
37	prum-alignment-L37	0.24189	0.30505	0.26808	0.18498	515.37	0.57313		0.28625	0.20724	0.15706	0.34946	514.48	0.3643		0.16266	0.25875	0.33157	0.24703	514.3	0.59032		519	315	518	225	518	501		0.606936	0.434363	0.967181
38	prum-alignment-L38	0.30586	0.16329	0.32544	0.2054	488.8	0.48873		0.34409	0.23113	0.2095	0.21528	487.81	0.44063		0.31684	0.13422	0.16133	0.38761	487.7	0.29555		489	102	488	58	488	436		0.208589	0.118852	0.893443
39	prum-alignment-L39	0.35316	0.18474	0.24854	0.21356	495.48	0.43328		0.29165	0.24754	0.17838	0.28243	495.55	0.42592		0.20876	0.30824	0.24088	0.24212	496.24	0.54912		516	131	516	80	517	439		0.253876	0.155039	0.84913
41	prum-alignment-L41	0.28912	0.25706	0.26767	0.18615	500.94	0.52473		0.30179	0.22321	0.19613	0.27887	501.94	0.41934		0.24736	0.21113	0.18325	0.35826	501.74	0.39438		501	50	502	14	502	350		0.0998004	0.0278884	0.697211
42	prum-alignment-L42	0.25917	0.28353	0.29303	0.16427	456.67	0.57656		0.29192	0.22883	0.18948	0.28978	457.53	0.41831		0.09211	0.44543	0.31774	0.14472	456.36	0.76317		459	99	460	43	459	396		0.215686	0.0934783	0.862745
43	prum-alignment-L43	0.30136	0.19628	0.30458	0.19778	484.79	0.50086		0.31497	0.18339	0.17084	0.3308	484.82	0.35423		0.23018	0.27533	0.25521	0.23928	484.59	0.53054		487	127	487	83	487	438		0.26078	0.170431	0.899384
44	prum-alignment-L44	0.30668	0.16616	0.3036	0.22356	463.71	0.46976		0.33369	0.17394	0.16554	0.32683	463.68	0.33948		0.22603	0.23757	0.22472	0.31168	463.51	0.46229		493	91	493	52	493	454		0.184584	0.105477	0.920892
48	prum-alignment-L48	0.31107	0.21341	0.31044	0.16508	462.73	0.52385		0.33781	0.22816	0.15435	0.27968	462.75	0.38251		0.30812	0.14969	0.2228	0.31939	462.68	0.37249		465	81	465	27	465	343		0.174194	0.0580645	0.737634
49	prum-alignment-L49	0.28801	0.20129	0.32118	0.18951	502.99	0.52247		0.35662	0.19355	0.16926	0.28057	502.01	0.36281		0.21802	0.22774	0.28301	0.27122	502.66	0.51075		506	202	505	137	506	480		0.399209	0.271287	0.948617
50	prum-alignment-L50	0.30237	0.21973	0.28739	0.19051	479.29	0.50712		0.35543	0.19907	0.1753	0.27021	478.33	0.37437		0.21056	0.2574	0.28507	0.24697	479.14	0.54247		483	188	482	164	483	443		0.389234	0.340249	0.917184
51	prum-alignment-L51	0.3033	0.27935	0.31233	0.10501	92.61	0.59168		0.47099	0.16899	0.14188	0.21814	92.63	0.31087		0.1589	0.25556	0.37213	0.21341	92.57	0.62769		93	15	93	9	93	76		0.16129	0.0967742	0.817204
53	prum-alignment-L53	0.24545	0.3042	0.30827	0.14208	470.82	0.61247		0.31894	0.26637	0.20856	0.20613	471.75	0.47493		0.0839	0.42381	0.37826	0.11403	471.37	0.80207		477	44	478	16	478	325		0.0922432	0.0334728	0.679916
54	prum-alignment-L54	0.28381	0.24914	0.24674	0.22031	455.9	0.49588		0.29865	0.20306	0.1745	0.3238	455.08	0.37756		0.1432	0.37736	0.29877	0.18066	454.82	0.67613		460	100	459	44	459	267		0.217391	0.0958606	0.581699
57	prum-alignment-L57	0.27885	0.2025	0.33514	0.1835	65	0.53764		0.44646	0.15431	0.12215	0.27708	65	0.27646		0.18492	0.15313	0.35176	0.31019	64.98	0.50489		65	7	65	4	65	54		0.107692	0.0615385	0.830769
58	prum-alignment-L58	0.3505	0.22606	0.2331	0.19034	512.42	0.45916		0.3499	0.28756	0.1143	0.24823	513.28	0.40186		0.25817	0.22	0.20803	0.3138	513.25	0.42803		514	28	515	10	515	209		0.0544747	0.0194175	0.405825
59	prum-alignment-L59	0.27263	0.27318	0.26912	0.18508	528.99	0.5423		0.27433	0.34189	0.19842	0.18535	529.95	0.54031		0.20441	0.32298	0.22429	0.24832	529.55	0.54727		532	66	533	15	533	374		0.12406	0.0281426	0.701689
61	prum-alignment-L61	0.32957	0.15371	0.37412	0.14259	416.52	0.52783		0.28985	0.26694	0.19683	0.24638	415.71	0.46377		0.31181	0.1652	0.14975	0.37325	416.38	0.31495		421	98	420	60	421	395		0.232779	0.142857	0.938242
62	prum-alignment-L62	0.31793	0.16031	0.3795	0.14226	571.99	0.53981		0.31917	0.23745	0.18499	0.25839	572.77	0.42244		0.36961	0.13764	0.14524	0.34751	571.79	0.28288		575	163	576	82	575	536		0.283478	0.142361	0.932174
63	prum-alignment-L63	0.32924	0.1378	0.38336	0.14959	389.63	0.52116		0.32839	0.24683	0.17845	0.24632	388.75	0.42528		0.35097	0.16532	0.12646	0.35725	388.67	0.29178		405	87	404	65	404	369		0.214815	0.160891	0.913366
64	prum-alignment-L64	0.33904	0.20641	0.33992	0.11464	533.26	0.54633		0.30549	0.24895	0.17621	0.26935	533.25	0.42516		0.37271	0.13104	0.12208	0.37417	533.17	0.25312		536	113	536	66	536	492		0.210821	0.123134	0.91791
65	prum-alignment-L65	0.31492	0.16778	0.31456	0.20275	368.99	0.48234		0.31119	0.25653	0.16848	0.2638	369	0.42501		0.30711	0.1599	0.19707	0.33592	368.95	0.35697		375	125	375	93	375	330		0.333333	0.248	0.88
67	prum-alignment-L67	0.34845	0.14837	0.31766	0.18553	370.17	0.46603		0.32803	0.2277	0.1764	0.26786	370.17	0.4041		0.24696	0.21901	0.22663	0.30741	370.07	0.44564		375	122	375	87	375	349		0.325333	0.232	0.930667
72	prum-alignment-L72	0.21956	0.38465	0.24576	0.15002	415.63	0.63041		0.21372	0.47866	0.13519	0.17244	415.77	0.61385		0.2333	0.26956	0.27639	0.22075	415.37	0.54595		418	123	418	93	418	381		0.294258	0.222488	0.911483
73	prum-alignment-L73	0.29092	0.20641	0.25236	0.25031	349.67	0.45877		0.23944	0.20127	0.15247	0.40682	349.69	0.35374		0.14347	0.33985	0.22205	0.29463	349.55	0.5619		350	107	350	59	350	328		0.305714	0.168571	0.937143
74	prum-alignment-L74	0.3023	0.2233	0.29596	0.17844	204.92	0.51926		0.29888	0.30728	0.17719	0.21664	203.94	0.48447		0.24502	0.29663	0.26553	0.19281	203.85	0.56216		205	56	204	30	204	180		0.273171	0.147059	0.882353
75	prum-alignment-L75	0.28918	0.18217	0.38436	0.14429	507.66	0.56653		0.39296	0.2572	0.13744	0.21239	507.71	0.39464		0.31585	0.17704	0.21568	0.29143	508.38	0.39272		514	247	514	215	515	498		0.480545	0.418288	0.96699
76	prum-alignment-L76	0.23609	0.34348	0.23088	0.18955	420.53	0.57436		0.35043	0.20877	0.2643	0.17651	420.76	0.47307		0.05216	0.51946	0.33869	0.08969	421.35	0.85815		427	155	427	122	428	394		0.362998	0.285714	0.920561
77	prum-alignment-L77	0.31477	0.24308	0.31961	0.12253	311.38	0.56269		0.44177	0.17603	0.12129	0.26091	311.45	0.29732		0.27961	0.16631	0.29927	0.25481	312.26	0.46558		314	158	314	127	315	296		0.503185	0.404459	0.939683
78	prum-alignment-L78	0.31008	0.1911	0.2373	0.26152	364.69	0.4284		0.26305	0.20695	0.14586	0.38414	364.75	0.35281		0.10376	0.47156	0.21399	0.21069	364.58	0.68555		365	91	365	48	365	329		0.249315	0.131507	0.90137
79	prum-alignment-L79	0.3382	0.21081	0.2709	0.1801	419.57	0.48171		0.35131	0.24917	0.19965	0.19987	419.58	0.44882		0.23604	0.24737	0.22721	0.28938	418.44	0.47458		420	85	420	21	419	384		0.202381	0.05	0.916468
80	prum-alignment-L80	0.3223	0.18367	0.27562	0.21841	418.19	0.45929		0.38935	0.18899	0.13134	0.29032	417.37	0.32033		0.32348	0.13312	0.18053	0.36286	418.04	0.31365		433	66	432	41	433	393		0.152425	0.0949074	0.907621
81	prum-alignment-L81	0.35904	0.17759	0.33367	0.1297	523.43	0.51126		0.49849	0.17241	0.09874	0.23036	522.66	0.27115		0.41115	0.08888	0.2685	0.23147	523.37	0.35738		533	372	532	292	533	523		0.697936	0.548872	0.981238
82	prum-alignment-L82	0.35437	0.19413	0.28436	0.16715	360.01	0.47849		0.31575	0.22004	0.27354	0.19068	360.06	0.49358		0.24775	0.27077	0.23915	0.24233	359.77	0.50992		365	104	365	55	365	329		0.284932	0.150685	0.90137
85	prum-alignment-L85	0.37881	0.2277	0.28081	0.11268	567.88	0.50851		0.36297	0.28204	0.17141	0.18358	567.88	0.45345		0.25505	0.25288	0.29807	0.194	567.7	0.55095		576	253	576	215	576	550		0.439236	0.373264	0.954861
86	prum-alignment-L86	0.317	0.28865	0.21783	0.17653	510.72	0.50648		0.27639	0.32343	0.19111	0.20907	510.82	0.51454		0.21771	0.24907	0.19456	0.33866	511.36	0.44363		513	126	513	63	514	482		0.245614	0.122807	0.937743
87	prum-alignment-L87	0.2861	0.27647	0.29493	0.1425	534.73	0.5714		0.33355	0.25598	0.18283	0.22765	534.75	0.43881		0.1502	0.36464	0.28051	0.20465	534.51	0.64515		536	60	536	20	536	366		0.11194	0.0373134	0.682836
88	prum-alignment-L88	0.30445	0.19446	0.30129	0.1998	399.67	0.49575		0.3563	0.30004	0.12028	0.22339	399.7	0.42032		0.27622	0.18455	0.18979	0.34945	399.65	0.37434		402	52	402	22	402	303		0.129353	0.0547264	0.753731
89	prum-alignment-L89	0.27652	0.23758	0.26443	0.22146	402.49	0.50201		0.32169	0.20913	0.16088	0.3083	401.49	0.37001		0.04956	0.44339	0.36618	0.14087	401.23	0.80957		403	60	402	28	402	334		0.148883	0.0696517	0.830846
91	prum-alignment-L91	0.36636	0.17989	0.25263	0.20112	557.85	0.43252		0.39075	0.2351	0.18389	0.19027	557.91	0.41899		0.32462	0.19246	0.16843	0.31449	557.85	0.36089		560	269	560	230	560	535		0.480357	0.410714	0.955357
94	prum-alignment-L94	0.33594	0.22933	0.25487	0.17987	250.76	0.4842		0.19134	0.19818	0.21399	0.3965	249.84	0.41217		0.04249	0.58631	0.31658	0.05462	249.75	0.90289		252	72	251	37	251	183		0.285714	0.14741	0.729084
95	prum-alignment-L95	0.29848	0.20974	0.26829	0.22349	362.98	0.47803		0.44323	0.13675	0.16814	0.25188	363	0.30489		0.21287	0.26217	0.24205	0.28292	363.88	0.50422		363	53	363	18	364	316		0.146006	0.0495868	0.868132
98	prum-alignment-L98	0.28635	0.14082	0.34353	0.2293	585.64	0.48435		0.35826	0.22148	0.182	0.23827	584.8	0.40348		0.32993	0.14048	0.16578	0.36381	584.71	0.30626		589	75	588	44	588	317		0.127334	0.0748299	0.539116
99	prum-alignment-L99	0.36238	0.13998	0.30551	0.19213	518.07	0.44549		0.29129	0.20627	0.19526	0.30718	518.14	0.40153		0.27611	0.22984	0.17312	0.32093	518.07	0.40296		520	102	520	57	520	467		0.196154	0.109615	0.898077
100	prum-alignment-L100	0.31802	0.19413	0.33124	0.15661	461.26	0.52537		0.36606	0.27603	0.17027	0.18763	462.11	0.4463		0.33532	0.19313	0.21285	0.25869	462.07	0.40598		472	237	473	217	473	457		0.502119	0.458774	0.966173
102	prum-alignment-L102	0.29247	0.17755	0.35763	0.17235	361.29	0.53518		0.36175	0.30822	0.13331	0.19673	361.19	0.44153		0.32566	0.19625	0.18463	0.29346	361.15	0.38088		364	149	364	149	364	293		0.409341	0.409341	0.804945
103	prum-alignment-L103	0.31854	0.21159	0.27752	0.19235	461.27	0.48911		0.36686	0.23381	0.14941	0.24992	462.28	0.38322		0.22851	0.26897	0.2656	0.23692	461.97	0.53457		462	104	463	65	463	434		0.225108	0.140389	0.937365
104	prum-alignment-L104	0.28676	0.24771	0.29448	0.17105	516.86	0.54219		0.34293	0.26597	0.16916	0.22194	516.89	0.43513		0.27089	0.18623	0.2284	0.31448	516.74	0.41463		519	88	519	39	519	480		0.169557	0.0751445	0.924855
105	prum-alignment-L105	0.20731	0.26915	0.41175	0.1118	462.07	0.6809		0.27173	0.26227	0.19571	0.27029	462.05	0.45798		0.06378	0.45982	0.3212	0.15519	461.53	0.78102		473	118	473	57	473	441		0.249471	0.120507	0.932347
107	prum-alignment-L107	0.31437	0.16389	0.34422	0.17752	565	0.50811		0.29055	0.26256	0.17112	0.27578	564.2	0.43368		0.22433	0.27539	0.16902	0.33125	563.88	0.44441		568	142	567	84	567	548		0.25	0.148148	0.96649
108	prum-alignment-L108	0.34753	0.18066	0.30309	0.16872	503.23	0.48375		0.31241	0.25556	0.1487	0.28333	503.31	0.40426		0.2421	0.29135	0.20047	0.26607	502.07	0.49182		505	106	505	51	504	458		0.209901	0.10099	0.90873
110	prum-alignment-L110	0.28977	0.2034	0.33584	0.17099	344.8	0.53924		0.3993	0.23861	0.14274	0.21935	344.84	0.38135		0.24923	0.1935	0.25555	0.30172	344.75	0.44905		347	191	347	175	347	331		0.550432	0.504323	0.95389
111	prum-alignment-L111	0.37765	0.1805	0.29383	0.14802	440.41	0.47433		0.29079	0.33594	0.20433	0.16894	441.25	0.54027		0.27686	0.22264	0.21567	0.28483	441.15	0.43831		445	243	446	222	446	431		0.546067	0.497758	0.966368
113	prum-alignment-L113	0.30504	0.22866	0.26317	0.20313	513.67	0.49183		0.3628	0.23102	0.19308	0.2131	513.64	0.4241		0.28785	0.23084	0.17947	0.30184	513.5	0.41031		520	127	520	94	520	439		0.244231	0.180769	0.844231
116	prum-alignment-L116	0.24825	0.24819	0.28855	0.215	443	0.53674		0.21961	0.23607	0.19846	0.34585	442.99	0.43453		0.08166	0.43349	0.32681	0.15804	442.87	0.7603		445	197	445	138	445	422		0.442697	0.310112	0.948315
118	prum-alignment-L118	0.26734	0.196	0.38444	0.15222	111.97	0.58044		0.36996	0.23766	0.19656	0.19582	110.96	0.43422		0.40494	0.1342	0.16215	0.29872	110.94	0.29635		112	21	111	23	111	99		0.1875	0.207207	0.891892
119	prum-alignment-L119	0.35717	0.22194	0.24311	0.17778	467.36	0.46505		0.29718	0.32968	0.21661	0.15653	467.42	0.54629		0.30287	0.17434	0.1623	0.36049	467.11	0.33664		470	144	470	100	470	437		0.306383	0.212766	0.929787
120	prum-alignment-L120	0.31237	0.30132	0.25986	0.12645	394.83	0.56118		0.29811	0.29838	0.17141	0.23209	395.69	0.46979		0.15579	0.35283	0.28578	0.20559	395.72	0.63861		395	95	396	32	396	363		0.240506	0.0808081	0.916667
121	prum-alignment-L121	0.29418	0.20251	0.29434	0.20897	564.02	0.49685		0.2928	0.26237	0.18413	0.2607	564	0.4465		0.27469	0.13679	0.17626	0.41226	563.96	0.31305		566	268	566	215	566	535		0.473498	0.379859	0.94523
122	prum-alignment-L122	0.28315	0.26028	0.25559	0.20098	529.42	0.51587		0.22404	0.41939	0.14029	0.21628	528.45	0.55968		0.24666	0.2361	0.1938	0.32344	529.33	0.4299		539	184	538	128	539	441		0.341373	0.237918	0.818182
125	prum-alignment-L125	0.29294	0.19989	0.30705	0.20011	500.33	0.50694		0.24096	0.2384	0.16288	0.35776	500.35	0.40128		0.1834	0.33036	0.25672	0.22952	500.05	0.58708		501	189	501	120	501	481		0.377246	0.239521	0.96008
126	prum-alignment-L126	0.26926	0.25257	0.29442	0.18375	465.37	0.54699		0.32306	0.2052	0.2393	0.23244	465.34	0.4445		0.06645	0.48811	0.33502	0.11042	465.76	0.82313		466	76	466	40	467	419		0.16309	0.0858369	0.897216
127	prum-alignment-L127	0.31483	0.18179	0.35572	0.14766	571.31	0.53751		0.35341	0.23677	0.12147	0.28835	572.17	0.35824		0.21522	0.32178	0.20617	0.25683	571.03	0.52795		575	157	576	80	575	550		0.273043	0.138889	0.956522
128	prum-alignment-L128	0.31471	0.19196	0.33016	0.16317	291.79	0.52212		0.32486	0.22971	0.17513	0.2703	291.79	0.40484		0.20045	0.279	0.17251	0.34804	290.77	0.45151		292	19	292	6	291	148		0.0650685	0.0205479	0.508591
129	prum-alignment-L129	0.27879	0.28287	0.28295	0.1554	468.49	0.56582		0.38198	0.25839	0.14388	0.21575	468.54	0.40227		0.20717	0.18532	0.2678	0.3397	468.33	0.45312		469	151	469	87	469	420		0.321962	0.185501	0.895522
130	prum-alignment-L130	0.30737	0.28211	0.24797	0.16255	520.5	0.53008		0.32459	0.26298	0.14893	0.26351	520.43	0.41191		0.17505	0.3291	0.29135	0.2045	520.08	0.62045		524	90	524	57	524	445		0.171756	0.108779	0.849237
131	prum-alignment-L131	0.39166	0.20146	0.30672	0.10016	327.19	0.50818		0.52803	0.12675	0.13029	0.21492	327.12	0.25704		0.26323	0.14874	0.34341	0.24463	326.16	0.49215		343	61	343	32	342	272		0.177843	0.0932945	0.795322
133	prum-alignment-L133	0.3079	0.23984	0.2766	0.17566	518.33	0.51644		0.32235	0.28516	0.17736	0.21513	518.36	0.46252		0.35821	0.146	0.18462	0.31117	517.25	0.33062		522	178	522	128	521	505		0.340996	0.245211	0.96929
134	prum-alignment-L134	0.25522	0.29328	0.33009	0.12141	466.85	0.62337		0.27305	0.3455	0.14289	0.23857	466.94	0.48839		0.11788	0.40988	0.33687	0.13537	466.69	0.74675		472	124	472	51	472	389		0.262712	0.108051	0.824153
135	prum-alignment-L135	0.2726	0.24798	0.32224	0.15718	507.86	0.57022		0.31675	0.27613	0.16027	0.24685	507.89	0.4364		0.18332	0.30965	0.28607	0.22096	506.81	0.59572		514	288	514	243	513	482		0.560311	0.472763	0.939571
136	prum-alignment-L136	0.28724	0.27799	0.25978	0.175	566.72	0.53777		0.29708	0.29619	0.14829	0.25844	566.74	0.44448		0.24919	0.14644	0.2001	0.40427	566.64	0.34654		567	126	567	73	567	433		0.222222	0.128748	0.763668
137	prum-alignment-L137	0.3526	0.17783	0.2927	0.17686	391	0.47053		0.34006	0.1918	0.1569	0.31123	391.99	0.3487		0.2629	0.23719	0.16734	0.33257	390.88	0.40453		391	77	392	43	391	345		0.196931	0.109694	0.882353
141	prum-alignment-L141	0.30911	0.26101	0.26383	0.16605	241.96	0.52484		0.37315	0.26231	0.19092	0.17363	242.98	0.45323		0.27022	0.27131	0.18088	0.27759	242.91	0.45219		242	57	243	31	243	223		0.235537	0.127572	0.917695
142	prum-alignment-L142	0.26319	0.24015	0.2884	0.20827	509.31	0.52855		0.38643	0.16403	0.1763	0.27324	510.15	0.34033		0.25555	0.19818	0.24652	0.29975	509.95	0.4447		513	109	514	52	514	464		0.212476	0.101167	0.902724
143	prum-alignment-L143	0.39254	0.13332	0.23921	0.23493	96.69	0.37253		0.31651	0.21408	0.24484	0.22457	96.73	0.45892		0.12795	0.4615	0.2615	0.14905	96.68	0.723		98	11	98	9	98	73		0.112245	0.0918367	0.744898
145	prum-alignment-L145	0.28796	0.26407	0.2411	0.20687	520.79	0.50517		0.31116	0.30513	0.14645	0.23726	520.87	0.45158		0.30508	0.17156	0.23292	0.29043	521.56	0.40448		523	184	523	107	524	478		0.351816	0.204589	0.912214
146	prum-alignment-L146	0.30792	0.23533	0.24704	0.2097	591.21	0.48237		0.35568	0.26618	0.16799	0.21015	591.23	0.43417		0.28022	0.21637	0.20612	0.29729	591.04	0.42249		596	173	596	109	596	517		0.290268	0.182886	0.86745
147	prum-alignment-L147	0.26226	0.20881	0.31114	0.2178	490.48	0.51995		0.33344	0.21042	0.18434	0.2718	490.5	0.39476		0.31205	0.13303	0.18521	0.36971	490.45	0.31824		499	187	499	138	499	451		0.374749	0.276553	0.903808
148	prum-alignment-L148	0.36423	0.19532	0.24239	0.19805	309.99	0.43771		0.20261	0.24724	0.1801	0.37005	310.99	0.42734		0.09917	0.44603	0.24512	0.20967	309.81	0.69115		310	22	311	8	310	247		0.0709677	0.0257235	0.796774
149	prum-alignment-L149	0.33365	0.20016	0.29653	0.16966	543.76	0.49669		0.35824	0.24019	0.18802	0.21355	542.87	0.42821		0.23723	0.20893	0.22782	0.32602	542.74	0.43675		548	250	547	220	547	529		0.456204	0.402194	0.967093
150	prum-alignment-L150	0.30847	0.13981	0.42382	0.1279	606.39	0.56363		0.38434	0.2958	0.13601	0.18386	605.59	0.43181		0.42452	0.09037	0.21097	0.27415	605.46	0.30134		619	277	618	296	618	594		0.447496	0.478964	0.961165
151	prum-alignment-L151	0.28814	0.25181	0.30842	0.15163	565.22	0.56023		0.42657	0.17757	0.10729	0.28857	566.02	0.28486		0.30035	0.15161	0.27251	0.27553	565.06	0.42412		570	247	571	164	570	546		0.433333	0.287215	0.957895
152	prum-alignment-L152	0.26377	0.25004	0.30171	0.18448	353.28	0.55175		0.30129	0.21668	0.17692	0.30511	353.34	0.3936		0.17381	0.28655	0.32617	0.21346	353.34	0.61272		355	17	355	2	355	155		0.0478873	0.0056338	0.43662
153	prum-alignment-L153	0.29006	0.17286	0.33685	0.20023	278	0.50971		0.3923	0.19764	0.21505	0.195	278.93	0.41269		0.17044	0.37085	0.24779	0.21092	278.7	0.61864		302	42	303	20	303	256		0.139073	0.0660066	0.844884
154	prum-alignment-L154	0.30985	0.24438	0.25631	0.18946	520.37	0.50069		0.30983	0.22721	0.19012	0.27284	520.24	0.41733		0.08084	0.49331	0.30997	0.11588	519.12	0.80328		523	86	523	42	522	387		0.164436	0.0803059	0.741379
155	prum-alignment-L155	0.29894	0.29755	0.28678	0.11673	515.38	0.58433		0.27425	0.3552	0.13901	0.23154	514.43	0.49421		0.27975	0.16341	0.20203	0.35481	515.09	0.36544		517	139	516	63	517	476		0.268859	0.122093	0.920696
157	prum-alignment-L157	0.33071	0.2398	0.26865	0.16084	440.73	0.50845		0.29769	0.24863	0.2466	0.20707	440.88	0.49523		0.16859	0.3353	0.2453	0.25081	440.63	0.5806		443	164	443	144	443	385		0.370203	0.325056	0.869074
158	prum-alignment-L158	0.29569	0.27812	0.24922	0.17697	592.04	0.52734		0.32902	0.31384	0.1545	0.20264	591.27	0.46834		0.34109	0.17962	0.19002	0.28928	591.91	0.36964		596	116	595	49	596	524		0.194631	0.0823529	0.879195
159	prum-alignment-L159	0.37593	0.19693	0.23231	0.19483	419.04	0.42924		0.33128	0.20815	0.15542	0.30515	419.79	0.36357		0.31056	0.23386	0.14761	0.30797	419.66	0.38147		426	146	427	92	427	396		0.342723	0.215457	0.9274
161	prum-alignment-L161	0.32836	0.23191	0.27933	0.16039	549.49	0.51124		0.30358	0.3353	0.14722	0.2139	548.51	0.48252		0.32211	0.16729	0.18606	0.32454	548.34	0.35335		551	216	550	170	550	446		0.392015	0.309091	0.810909
162	prum-alignment-L162	0.31107	0.18926	0.28436	0.21531	373.92	0.47362		0.32438	0.21688	0.15651	0.30224	373.92	0.37339		0.11575	0.35699	0.28671	0.24055	373.58	0.6437		393	60	393	29	393	335		0.152672	0.0737913	0.852417
163	prum-alignment-L163	0.2166	0.30173	0.35575	0.12593	341.85	0.65748		0.39903	0.22518	0.17597	0.19983	341.9	0.40115		0.01203	0.43116	0.53624	0.02058	341.88	0.9674		354	69	354	40	354	248		0.194915	0.112994	0.700565
165	prum-alignment-L165	0.22299	0.27252	0.32457	0.17993	190.61	0.59709		0.23449	0.35185	0.15833	0.25534	189.72	0.51018		0.17474	0.32639	0.26939	0.22949	189.66	0.59578		210	68	209	57	209	160		0.32381	0.272727	0.76555
169	prum-alignment-L169	0.33371	0.21506	0.29576	0.15547	369.97	0.51082		0.30851	0.26694	0.20255	0.22199	369.99	0.46949		0.21357	0.33281	0.24876	0.20485	369.68	0.58157		370	46	370	14	370	289		0.124324	0.0378378	0.781081
170	prum-alignment-L170	0.24222	0.42664	0.20282	0.12831	514.69	0.62946		0.35037	0.3017	0.16842	0.17951	514.76	0.47012		0.25216	0.19153	0.2428	0.31351	514.62	0.43433		518	48	518	26	518	264		0.0926641	0.0501931	0.509653
171	prum-alignment-L171	0.28806	0.25972	0.29391	0.15831	530.62	0.55363		0.32767	0.26033	0.19736	0.21465	530.63	0.45769		0.24957	0.20698	0.22732	0.31612	530.35	0.4343		531	23	531	15	531	356		0.0433145	0.0282486	0.670433
175	prum-alignment-L175	0.30216	0.24471	0.26478	0.18834	573.68	0.50949		0.36365	0.31851	0.1335	0.18434	572.88	0.45201		0.35049	0.15876	0.15529	0.33545	572.68	0.31405		577	148	576	78	576	537		0.256499	0.135417	0.932292
176	prum-alignment-L176	0.2675	0.23262	0.31941	0.18046	548.93	0.55203		0.3396	0.20984	0.16925	0.28131	549.9	0.37909		0.24193	0.17425	0.22006	0.36376	549.67	0.39431		549	127	550	54	550	512		0.23133	0.0981818	0.930909
177	prum-alignment-L177	0.31891	0.25588	0.23708	0.18813	515.36	0.49296		0.34966	0.26533	0.16296	0.22204	515.47	0.42829		0.26747	0.19227	0.21335	0.32691	515.23	0.40562		517	117	517	59	517	462		0.226306	0.11412	0.893617
178	prum-alignment-L178	0.33262	0.23472	0.28316	0.1495	565.63	0.51788		0.31902	0.2854	0.15706	0.23851	565.65	0.44246		0.26663	0.215	0.25453	0.26383	565.34	0.46953		570	189	570	118	570	542		0.331579	0.207018	0.950877
180	prum-alignment-L180	0.27107	0.20358	0.26713	0.25822	509.88	0.47071		0.22909	0.1953	0.15499	0.42061	510.82	0.35029		0.22539	0.24751	0.2241	0.303	509.72	0.47161		512	132	513	55	512	437		0.257812	0.107212	0.853516
181	prum-alignment-L181	0.31483	0.21505	0.33075	0.13937	551.82	0.5458		0.35304	0.21873	0.1852	0.24303	552.74	0.40393		0.22223	0.24325	0.32212	0.21239	551.84	0.56537		555	207	556	182	555	524		0.372973	0.327338	0.944144
182	prum-alignment-L182	0.27311	0.2398	0.28182	0.20526	319.88	0.52162		0.29363	0.29962	0.17274	0.234	320.88	0.47236		0.18766	0.26624	0.2494	0.29669	320.79	0.51564		320	112	321	51	321	309		0.35	0.158879	0.962617
183	prum-alignment-L183	0.1916	0.2974	0.30947	0.20153	399.73	0.60687		0.2699	0.21294	0.21266	0.30451	400.62	0.4256		0.10202	0.41606	0.30639	0.17553	400.6	0.72245		402	118	403	73	403	381		0.293532	0.181141	0.945409
184	prum-alignment-L184	0.30118	0.23429	0.26216	0.20237	455.89	0.49645		0.20343	0.4018	0.12923	0.26555	455.93	0.53103		0.32928	0.12741	0.147	0.39631	455.85	0.27441		462	388	462	345	462	447		0.839827	0.746753	0.967532
186	prum-alignment-L186	0.26939	0.15837	0.31488	0.25736	481.65	0.47325		0.38362	0.23343	0.14525	0.2377	481.69	0.37868		0.271	0.15491	0.22225	0.35183	481.62	0.37716		488	262	488	228	488	468		0.536885	0.467213	0.959016
187	prum-alignment-L187	0.35822	0.18744	0.2759	0.17844	481.79	0.46334		0.2962	0.2807	0.21093	0.21217	481.81	0.49163		0.26052	0.27526	0.21522	0.249	482.67	0.49048		482	157	482	110	483	465		0.325726	0.228216	0.962733
188	prum-alignment-L188	0.30002	0.23919	0.30477	0.15602	409.8	0.54396		0.30885	0.17607	0.20226	0.31282	409.81	0.37833		0.22882	0.18467	0.22877	0.35774	409.7	0.41344		410	86	410	34	410	369		0.209756	0.0829268	0.9
189	prum-alignment-L189	0.3302	0.19086	0.29011	0.18883	452.58	0.48097		0.38469	0.24653	0.13122	0.23757	452.57	0.37775		0.3305	0.15754	0.18444	0.32753	452.18	0.34198		457	102	457	63	457	398		0.223195	0.137856	0.870897
190	prum-alignment-L190	0.30508	0.22166	0.2945	0.17876	478.5	0.51616		0.33311	0.24535	0.15635	0.26519	478.47	0.4017		0.25907	0.22841	0.22441	0.28811	478.21	0.45282		480	88	480	33	480	443		0.183333	0.06875	0.922917
192	prum-alignment-L192	0.30665	0.1932	0.29062	0.20952	348.96	0.48382		0.2691	0.21409	0.19889	0.31793	348.99	0.41298		0.19335	0.28694	0.24914	0.27057	349.93	0.53608		349	63	349	26	350	319		0.180516	0.0744986	0.911429
193	prum-alignment-L193	0.29016	0.19799	0.30039	0.21145	145.99	0.49838		0.23285	0.2288	0.23857	0.29978	146.99	0.46737		0.0411	0.52251	0.37714	0.05924	145.93	0.89965		146	16	147	15	146	97		0.109589	0.102041	0.664384
194	prum-alignment-L194	0.30086	0.22823	0.25627	0.21464	583.75	0.4845		0.35722	0.2488	0.16935	0.22463	584.82	0.41815		0.19611	0.25485	0.23248	0.31657	583.33	0.48733		591	126	592	68	592	530		0.213198	0.114865	0.89527
195	prum-alignment-L195	0.26372	0.23524	0.33834	0.1627	508.64	0.57358		0.30381	0.18881	0.218	0.28938	508.7	0.40681		0.17637	0.32324	0.30975	0.19064	509.11	0.63299		510	111	510	65	511	482		0.217647	0.127451	0.943249
196	prum-alignment-L196	0.28673	0.20516	0.31371	0.19439	505.25	0.51887		0.3272	0.19771	0.2246	0.2505	504.37	0.42231		0.24244	0.21027	0.21307	0.33422	505.21	0.42334		507	115	506	62	507	447		0.226824	0.12253	0.881657
197	prum-alignment-L197	0.29436	0.24797	0.30304	0.15463	301.25	0.55101		0.33585	0.23571	0.18101	0.24743	302.24	0.41672		0.23066	0.27037	0.28671	0.21227	302.06	0.55708		302	51	303	32	303	258		0.168874	0.105611	0.851485
201	prum-alignment-L201	0.26668	0.28768	0.2886	0.15704	295.83	0.57628		0.34399	0.26288	0.2046	0.18853	294.96	0.46748		0.22221	0.28956	0.29452	0.1937	295.81	0.58408		299	183	298	154	299	276		0.61204	0.516779	0.923077
202	prum-alignment-L202	0.31505	0.24081	0.29233	0.15182	513.76	0.53314		0.34993	0.29916	0.11985	0.23106	513.81	0.41901		0.33937	0.1602	0.15075	0.34967	514.57	0.31095		517	124	517	90	518	332		0.239845	0.174081	0.640927
203	prum-alignment-L203	0.30826	0.19893	0.3304	0.16241	634.66	0.52933		0.41468	0.24706	0.13402	0.20425	633.82	0.38108		0.33444	0.14846	0.2015	0.3156	634.5	0.34996		638	99	637	70	638	420		0.155172	0.10989	0.658307
204	prum-alignment-L204	0.28792	0.29508	0.2464	0.1706	613.66	0.54148		0.357	0.2711	0.13592	0.23598	614.55	0.40702		0.23473	0.27777	0.25717	0.23033	614.42	0.53494		616	201	617	134	617	528		0.326299	0.21718	0.855754
205	prum-alignment-L205	0.26201	0.28389	0.2723	0.1818	469.84	0.55619		0.37103	0.31187	0.12022	0.19688	469.89	0.43209		0.28469	0.14881	0.18413	0.38237	469.8	0.33294		472	175	472	128	472	327		0.370763	0.271186	0.692797
206	prum-alignment-L206	0.25622	0.3039	0.26715	0.17274	496.74	0.57105		0.24461	0.42126	0.15637	0.17776	497.61	0.57763		0.22136	0.2808	0.28234	0.21551	497.56	0.56314		503	209	504	183	504	477		0.415507	0.363095	0.946429
207	prum-alignment-L207	0.27676	0.27501	0.28563	0.16261	330.98	0.56064		0.30797	0.18442	0.16621	0.3414	330.97	0.35063		0.13491	0.35864	0.29411	0.21234	330.86	0.65275		331	53	331	16	331	296		0.160121	0.0483384	0.89426
208	prum-alignment-L208	0.25672	0.25817	0.33365	0.15146	128.07	0.59182		0.31039	0.20084	0.13191	0.35686	128.1	0.33275		0.04021	0.49502	0.36967	0.09511	128.02	0.86469		129	19	129	3	129	109		0.147287	0.0232558	0.844961
209	prum-alignment-L209	0.31233	0.23271	0.28597	0.16899	206.99	0.51868		0.36585	0.21654	0.18553	0.23208	206.99	0.40207		0.27629	0.15413	0.19101	0.37857	206.96	0.34514		207	38	207	22	207	173		0.183575	0.10628	0.835749
211	prum-alignment-L211	0.33202	0.22702	0.25833	0.18263	439.94	0.48535		0.32834	0.26975	0.18785	0.21406	440.92	0.4576		0.19639	0.33554	0.22792	0.24015	440.7	0.56346		442	213	443	185	443	379		0.4819	0.417607	0.85553
213	prum-alignment-L213	0.30811	0.20207	0.29613	0.19368	629.91	0.4982		0.35214	0.27842	0.19132	0.17813	629.92	0.46974		0.25765	0.2331	0.24269	0.26656	629.73	0.47579		631	184	631	134	631	598		0.291601	0.212361	0.947702
216	prum-alignment-L216	0.40059	0.1713	0.24067	0.18744	549.31	0.41197		0.33556	0.26344	0.25313	0.14787	549.36	0.51657		0.28108	0.204	0.23951	0.2754	549.2	0.44351		559	320	559	328	559	544		0.572451	0.586762	0.973166
221	prum-alignment-L221	0.27222	0.24957	0.30295	0.17526	587.2	0.55252		0.32205	0.18235	0.17501	0.32059	586.39	0.35736		0.16835	0.30418	0.31711	0.21035	586.04	0.62129		591	99	590	21	590	527		0.167513	0.0355932	0.89322
222	prum-alignment-L222	0.27689	0.2567	0.27996	0.18644	418.19	0.53666		0.2993	0.23002	0.19846	0.27222	419.13	0.42848		0.07967	0.47131	0.3628	0.08622	419.17	0.83411		419	93	420	35	420	359		0.221957	0.0833333	0.854762
223	prum-alignment-L223	0.33668	0.11957	0.30414	0.23961	75.16	0.42371		0.40242	0.13763	0.36306	0.09689	76.13	0.50069		0.08734	0.37656	0.37019	0.16591	75.15	0.74675		76	10	77	16	76	70		0.131579	0.207792	0.921053
224	prum-alignment-L224	0.2623	0.22883	0.32523	0.18364	285.94	0.55406		0.29012	0.2203	0.19927	0.29031	285.98	0.41957		0.17301	0.34415	0.22748	0.25536	285.79	0.57163		286	37	286	7	286	259		0.129371	0.0244755	0.905594
225	prum-alignment-L225	0.34487	0.24003	0.25426	0.16084	189.98	0.49429		0.2422	0.33582	0.17953	0.24245	189.98	0.51535		0.30109	0.20438	0.2	0.29453	190.9	0.40438		190	17	190	5	191	81		0.0894737	0.0263158	0.424084
226	prum-alignment-L226	0.32941	0.2122	0.32497	0.13343	598.61	0.53717		0.31342	0.32247	0.1588	0.20531	598.66	0.48127		0.24558	0.2617	0.25539	0.23733	598.25	0.51709		605	175	605	84	605	511		0.289256	0.138843	0.844628
228	prum-alignment-L228	0.35015	0.19331	0.26013	0.19642	538.94	0.45344		0.36959	0.17073	0.17876	0.28091	537.92	0.34949		0.15313	0.35506	0.25035	0.24147	537.51	0.60541		539	61	538	14	538	489		0.113173	0.0260223	0.908922
229	prum-alignment-L229	0.30571	0.20474	0.28826	0.20128	371.49	0.493		0.33492	0.20731	0.21096	0.24681	371.52	0.41827		0.20208	0.2677	0.26435	0.26586	372.26	0.53205		372	71	372	35	373	326		0.19086	0.094086	0.873995
230	prum-alignment-L230	0.30654	0.15775	0.29939	0.23631	441.98	0.45714		0.2484	0.21257	0.1996	0.33942	441.97	0.41217		0.18885	0.31189	0.26871	0.23054	441.73	0.5806		442	47	442	17	442	333		0.106335	0.0384615	0.753394
231	prum-alignment-L231	0.32491	0.24146	0.24512	0.18851	271.91	0.48658		0.26572	0.37588	0.16427	0.19414	271.93	0.54015		0.23504	0.28389	0.18933	0.29174	272.75	0.47322		273	56	273	36	274	238		0.205128	0.131868	0.868613
232	prum-alignment-L232	0.30396	0.17212	0.3695	0.15442	579.05	0.54162		0.32258	0.20925	0.15111	0.31705	578.25	0.36036		0.20893	0.23719	0.20144	0.35243	577.92	0.43863		582	136	581	50	581	563		0.233677	0.0860585	0.969019
233	prum-alignment-L233	0.22347	0.33588	0.34586	0.09479	252.86	0.68174		0.32095	0.32621	0.20487	0.14798	252.91	0.53108		0.09627	0.37505	0.44706	0.08163	252.75	0.82211		259	83	259	68	259	216		0.320463	0.262548	0.833977
234	prum-alignment-L234	0.30551	0.33124	0.21487	0.14838	484.79	0.54611		0.37656	0.26446	0.13217	0.22681	484.85	0.39663		0.2462	0.21393	0.31282	0.22705	484.5	0.52675		486	141	486	96	486	433		0.290123	0.197531	0.890947
235	prum-alignment-L235	0.28503	0.27759	0.24494	0.19245	463.88	0.52253		0.34693	0.26672	0.20861	0.17773	464.85	0.47533		0.21974	0.26225	0.21911	0.2989	464.67	0.48136		464	125	465	73	465	401		0.269397	0.156989	0.862366
239	prum-alignment-L239	0.28504	0.25365	0.28247	0.17884	238.23	0.53612		0.27774	0.26173	0.23021	0.23032	238.22	0.49194		0.08722	0.50741	0.32505	0.08032	238.95	0.83246		241	80	241	50	242	208		0.33195	0.207469	0.859504
240	prum-alignment-L240	0.2252	0.35174	0.27327	0.14978	442.84	0.62501		0.23968	0.36086	0.21504	0.18442	443.65	0.5759		0.08559	0.47528	0.35674	0.08239	443.42	0.83202		488	81	489	36	489	311		0.165984	0.0736196	0.635992
241	prum-alignment-L241	0.27205	0.25922	0.28788	0.18085	521.91	0.5471		0.37538	0.23123	0.21839	0.17501	521.14	0.44962		0.08826	0.47003	0.28062	0.16109	520.79	0.75065		526	72	525	22	525	471		0.136882	0.0419048	0.897143
242	prum-alignment-L242	0.34235	0.24111	0.32439	0.09215	364.95	0.5655		0.41262	0.22089	0.13555	0.23094	364.96	0.35644		0.21018	0.29438	0.34468	0.15076	364.76	0.63906		365	63	365	23	365	322		0.172603	0.0630137	0.882192
243	prum-alignment-L243	0.26939	0.25743	0.29679	0.17639	245.82	0.55422		0.25537	0.24721	0.15823	0.3392	246.72	0.40544		0.07573	0.47329	0.33806	0.11292	246.58	0.81135		247	84	248	47	248	226		0.340081	0.189516	0.91129
244	prum-alignment-L244	0.42308	0.19084	0.25555	0.13052	260.7	0.44639		0.39283	0.19248	0.21155	0.20313	260.78	0.40403		0.24258	0.21755	0.33638	0.20348	261.54	0.55393		262	59	262	45	263	217		0.225191	0.171756	0.825095
245	prum-alignment-L245	0.28287	0.22395	0.28787	0.20531	497.4	0.51182		0.26106	0.24882	0.14672	0.3434	497.41	0.39554		0.24698	0.17491	0.2141	0.36402	497.25	0.38901		498	69	498	10	498	447		0.138554	0.0200803	0.89759
246	prum-alignment-L246	0.30469	0.23873	0.27132	0.18526	504.46	0.51005		0.34081	0.18686	0.20715	0.26518	504.61	0.39401		0.24189	0.21359	0.25654	0.28798	504.37	0.47013		506	105	506	36	506	418		0.20751	0.0711462	0.826087
247	prum-alignment-L247	0.30906	0.18709	0.29241	0.21144	495.59	0.4795		0.36168	0.22542	0.14694	0.26595	495.53	0.37236		0.31032	0.15869	0.1688	0.36219	494.57	0.32749		500	240	500	188	499	474		0.48	0.376	0.9499
248	prum-alignment-L248	0.32909	0.20902	0.28192	0.17996	382.83	0.49094		0.34173	0.22102	0.22021	0.21704	383.81	0.44123		0.22343	0.26941	0.23665	0.27051	383.71	0.50606		383	96	384	60	384	334		0.250653	0.15625	0.869792
249	prum-alignment-L249	0.33487	0.25254	0.30009	0.1125	254.59	0.55263		0.35783	0.25727	0.15755	0.22735	255.57	0.41482		0.22105	0.2153	0.36531	0.19834	255.45	0.58061		257	78	258	44	258	213		0.303502	0.170543	0.825581
250	prum-alignment-L250	0.34315	0.17839	0.31749	0.16098	389.2	0.49588		0.36441	0.19515	0.19158	0.24886	389.22	0.38673		0.21231	0.30266	0.23348	0.25155	389.09	0.53614		391	106	391	85	391	355		0.2711	0.217391	0.907928
251	prum-alignment-L251	0.28519	0.17012	0.3233	0.22139	572.6	0.49342		0.30961	0.20699	0.17127	0.31212	572.59	0.37826		0.31371	0.14745	0.17615	0.36268	572.37	0.3236		577	168	577	95	577	537		0.291161	0.164645	0.930676
252	prum-alignment-L252	0.29155	0.19211	0.32248	0.19386	493.82	0.51459		0.31984	0.20533	0.16753	0.3073	494.85	0.37286		0.27805	0.1427	0.21287	0.36638	493.74	0.35557		494	154	495	75	494	445		0.311741	0.151515	0.90081
253	prum-alignment-L253	0.27898	0.21817	0.26571	0.23714	333.44	0.48388		0.21195	0.27565	0.13851	0.37388	333.44	0.41416		0.16334	0.30308	0.20861	0.32497	333.37	0.51169		334	67	334	26	334	253		0.200599	0.0778443	0.757485
255	prum-alignment-L255	0.20344	0.31122	0.36676	0.11858	560.64	0.67798		0.30725	0.24238	0.17351	0.27686	559.8	0.41589		0.14786	0.28665	0.28664	0.27884	559.54	0.57329		565	195	564	133	564	556		0.345133	0.235816	0.985816
256	prum-alignment-L256	0.28564	0.17121	0.30813	0.23502	563.22	0.47934		0.31641	0.27934	0.15066	0.25359	564.03	0.43		0.31403	0.14938	0.16694	0.36965	563.86	0.31632		574	248	575	200	575	550		0.432056	0.347826	0.956522
257	prum-alignment-L257	0.22329	0.26848	0.38893	0.1193	568.19	0.65741		0.30378	0.23954	0.18147	0.27521	568.97	0.42101		0.09659	0.41615	0.25897	0.22829	568.49	0.67512		572	61	573	11	573	550		0.106643	0.0191972	0.95986
258	prum-alignment-L258	0.34225	0.20308	0.27883	0.17584	547.64	0.48191		0.33091	0.32072	0.15652	0.19185	547.65	0.47724		0.35302	0.15875	0.16991	0.31832	547.4	0.32866		548	122	548	58	548	503		0.222628	0.105839	0.917883
260	prum-alignment-L260	0.29297	0.15048	0.43148	0.12507	333.87	0.58196		0.23654	0.35325	0.17965	0.23055	333.98	0.5329		0.34018	0.18117	0.16875	0.3099	333.99	0.34992		334	8	334	0	334	63		0.0239521	0	0.188623
261	prum-alignment-L261	0.3336	0.21111	0.28546	0.16983	434.99	0.49657		0.3321	0.29543	0.17938	0.19309	436	0.47481		0.20111	0.29989	0.22798	0.27102	435.84	0.52787		435	25	436	10	436	248		0.0574713	0.0229358	0.568807
262	prum-alignment-L262	0.2983	0.22246	0.27477	0.20447	431.25	0.49723		0.3472	0.21387	0.22273	0.2162	432.25	0.4366		0.19874	0.28429	0.26513	0.25184	432.02	0.54942		433	120	434	87	434	402		0.277136	0.200461	0.926267
264	prum-alignment-L264	0.28987	0.17633	0.34073	0.19308	547.99	0.51706		0.29714	0.21119	0.1538	0.33787	547.94	0.36499		0.18629	0.26446	0.26861	0.28065	546.89	0.53307		550	78	550	29	549	450		0.141818	0.0527273	0.819672
265	prum-alignment-L265	0.26624	0.241	0.44238	0.05038	41	0.68338		0.4046	0.11933	0.23826	0.23781	42	0.35759		0.15318	0.19968	0.30495	0.34219	40.97	0.50463		41	5	42	2	41	37		0.121951	0.047619	0.902439
266	prum-alignment-L266	0.32668	0.21852	0.27608	0.17873	611.85	0.4946		0.32833	0.24331	0.15559	0.27278	611.85	0.3989		0.21994	0.25765	0.24242	0.27999	611.66	0.50007		612	176	612	138	612	552		0.287582	0.22549	0.901961
267	prum-alignment-L267	0.34866	0.21449	0.29639	0.14046	506.77	0.51088		0.45878	0.15364	0.11841	0.26916	506.8	0.27205		0.35417	0.09774	0.23667	0.31142	507.58	0.33441		513	205	513	143	514	495		0.39961	0.278752	0.963035
269	prum-alignment-L269	0.28056	0.22247	0.36209	0.13488	358.97	0.58456		0.36218	0.18067	0.16467	0.29249	358.97	0.34534		0.27446	0.19151	0.20353	0.3305	358.79	0.39504		359	28	359	4	359	327		0.0779944	0.0111421	0.910864
270	prum-alignment-L270	0.32243	0.20251	0.30445	0.1706	454.87	0.50696		0.31224	0.27043	0.1995	0.21782	454.8	0.46993		0.24463	0.20667	0.20747	0.34122	454.66	0.41414		460	162	460	152	460	446		0.352174	0.330435	0.969565
271	prum-alignment-L271	0.23248	0.2363	0.33043	0.20079	476.4	0.56673		0.34051	0.20888	0.21397	0.23663	477.44	0.42285		0.15858	0.33294	0.28572	0.22276	477.31	0.61866		479	86	480	59	480	293		0.179541	0.122917	0.610417
272	prum-alignment-L272	0.26882	0.21982	0.34635	0.16501	162.71	0.56617		0.3873	0.16371	0.1751	0.27389	163.65	0.33881		0.21404	0.31431	0.22405	0.24761	162.74	0.53836		164	2	165	0	164	50		0.0121951	0	0.304878
275	prum-alignment-L275	0.24439	0.25776	0.33906	0.15879	164.29	0.59682		0.31984	0.19885	0.17441	0.3069	165.26	0.37326		0.16964	0.35578	0.28145	0.19313	165.16	0.63723		165	20	166	7	166	151		0.121212	0.0421687	0.909639
276	prum-alignment-L276	0.2842	0.23262	0.28442	0.19875	551.1	0.51704		0.34565	0.18026	0.16681	0.30728	552.03	0.34707		0.18227	0.27579	0.28268	0.25926	550.96	0.55847		553	122	554	59	553	519		0.220615	0.106498	0.938517
277	prum-alignment-L277	0.268	0.25786	0.32105	0.15309	230.99	0.57891		0.42251	0.16814	0.1423	0.26706	231.99	0.31044		0.15262	0.25639	0.30024	0.29075	231.91	0.55663		231	33	232	18	232	218		0.142857	0.0775862	0.939655
279	prum-alignment-L279	0.21433	0.23475	0.41616	0.13476	200.25	0.65091		0.33903	0.30929	0.13568	0.21599	200.26	0.44497		0.25295	0.14763	0.24114	0.35828	201.24	0.38877		201	95	201	87	202	187		0.472637	0.432836	0.925743
280	prum-alignment-L280	0.25993	0.1807	0.41278	0.14659	504.49	0.59348		0.41622	0.29313	0.10234	0.18831	504.47	0.39547		0.35769	0.17365	0.21067	0.25799	503.5	0.38432		510	232	510	222	509	501		0.454902	0.435294	0.984283
281	prum-alignment-L281	0.34378	0.26163	0.2243	0.1703	432.8	0.48593		0.31345	0.311	0.14961	0.22593	433.83	0.46061		0.25421	0.23874	0.21021	0.29683	433.67	0.44895		433	82	434	27	434	368		0.189376	0.062212	0.847926
282	prum-alignment-L282	0.28642	0.18004	0.35193	0.18161	556.84	0.53197		0.30725	0.2333	0.17813	0.28131	555.88	0.41143		0.30902	0.16966	0.17549	0.34583	556.7	0.34515		557	135	556	72	557	514		0.24237	0.129496	0.922801
288	prum-alignment-L288	0.30114	0.28453	0.23238	0.18195	515.43	0.51691		0.28802	0.20485	0.17039	0.33674	515.48	0.37524		0.06234	0.51792	0.31179	0.10796	515.27	0.82971		517	57	517	10	517	367		0.110251	0.0193424	0.709865
289	prum-alignment-L289	0.33826	0.19347	0.26734	0.20093	549.72	0.46081		0.39064	0.22278	0.16048	0.22611	549.73	0.38326		0.23761	0.25071	0.26466	0.24701	548.64	0.51537		554	152	554	78	553	517		0.274368	0.140794	0.934901
290	prum-alignment-L290	0.34657	0.20986	0.27845	0.16513	502.94	0.48831		0.3432	0.25074	0.15626	0.24979	502.89	0.407		0.28226	0.16295	0.1874	0.36739	502.73	0.35035		506	143	506	91	506	396		0.282609	0.179842	0.782609
292	prum-alignment-L292	0.31045	0.18875	0.30958	0.19122	559.76	0.49833		0.36208	0.18589	0.13755	0.31448	559.75	0.32344		0.33426	0.16091	0.20301	0.30182	559.6	0.36392		567	238	567	150	567	538		0.419753	0.26455	0.948854
293	prum-alignment-L293	0.30436	0.23636	0.23958	0.2197	486.83	0.47594		0.38215	0.22185	0.1841	0.2119	487.76	0.40595		0.17626	0.32634	0.23662	0.26078	487.5	0.56296		489	37	490	13	490	301		0.0756646	0.0265306	0.614286
294	prum-alignment-L294	0.24591	0.26421	0.23513	0.25475	376.06	0.49934		0.29297	0.3513	0.19177	0.16397	377.06	0.54307		0.27846	0.19528	0.13338	0.39288	375.86	0.32866		377	76	378	26	377	343		0.201592	0.0687831	0.909814
295	prum-alignment-L295	0.29576	0.24144	0.30537	0.15743	508.32	0.54681		0.32041	0.25948	0.19166	0.22844	507.41	0.45114		0.22748	0.28263	0.24634	0.24355	508.07	0.52897		510	54	509	12	510	371		0.105882	0.0235756	0.727451
296	prum-alignment-L296	0.38408	0.14936	0.29174	0.17482	497.79	0.4411		0.47975	0.23381	0.12477	0.16167	498.72	0.35858		0.24265	0.23866	0.33306	0.18562	498.31	0.57172		500	74	501	46	501	345		0.148	0.0918164	0.688623
297	prum-alignment-L297	0.2768	0.28337	0.36034	0.07949	425.24	0.64371		0.48043	0.14544	0.12959	0.24454	425.24	0.27503		0.14766	0.23811	0.47184	0.14239	424.05	0.70995		428	128	428	95	427	363		0.299065	0.221963	0.850117
298	prum-alignment-L298	0.26073	0.22853	0.33828	0.17246	601.65	0.56681		0.37404	0.23358	0.14565	0.24673	600.85	0.37923		0.11577	0.394	0.32768	0.16256	600.4	0.72168		606	206	605	163	605	556		0.339934	0.269421	0.919008
301	prum-alignment-L301	0.29302	0.23812	0.2669	0.20196	222.52	0.50502		0.35211	0.2166	0.1689	0.26239	223.39	0.3855		0.11834	0.47209	0.32179	0.08778	223.34	0.79388		227	102	228	92	228	207		0.449339	0.403509	0.907895
302	prum-alignment-L302	0.29328	0.18466	0.27994	0.24211	245.16	0.4646		0.35436	0.21941	0.14813	0.27811	246.07	0.36754		0.19714	0.34515	0.23914	0.21858	246.04	0.58429		246	39	247	16	247	203		0.158537	0.0647773	0.821862
303	prum-alignment-L303	0.27047	0.19873	0.29858	0.23222	481.65	0.49731		0.33137	0.32292	0.12061	0.2251	481.48	0.44353		0.29533	0.19792	0.20194	0.30481	481.23	0.39986		488	175	487	138	487	389		0.358607	0.283368	0.798768
305	prum-alignment-L305	0.21891	0.2873	0.38009	0.1137	238	0.66739		0.2875	0.26859	0.21514	0.22877	238.89	0.48373		0.03512	0.45385	0.45732	0.05372	238.69	0.91117		250	69	251	46	251	203		0.276	0.183267	0.808765
306	prum-alignment-L306	0.32905	0.15478	0.36577	0.1504	590.96	0.52055		0.28408	0.29261	0.30802	0.11529	590.93	0.60063		0.22556	0.2521	0.2314	0.29095	591.44	0.4835		597	90	597	57	598	265		0.150754	0.0954774	0.443144
307	prum-alignment-L307	0.23871	0.18207	0.33596	0.24327	301.93	0.51803		0.16554	0.2489	0.20131	0.38426	301.95	0.45021		0.08533	0.49104	0.30146	0.12216	301.85	0.7925		302	93	302	60	302	273		0.307947	0.198675	0.903974
310	prum-alignment-L310	0.35296	0.21263	0.26735	0.16707	516.87	0.47998		0.29356	0.30051	0.20099	0.20495	516.87	0.5015		0.22276	0.27825	0.24638	0.2526	517.72	0.52463		518	138	518	100	519	448		0.266409	0.19305	0.863198
311	prum-alignment-L311	0.3338	0.24405	0.24892	0.17323	422.4	0.49297		0.37849	0.17973	0.20741	0.23437	422.44	0.38714		0.21293	0.27346	0.26021	0.2534	422.33	0.53367		426	40	426	10	426	330		0.0938967	0.0234742	0.774648
312	prum-alignment-L312	0.2952	0.20388	0.2732	0.22772	310.34	0.47708		0.3998	0.16718	0.15601	0.27701	310.42	0.32319		0.24291	0.2611	0.27174	0.22424	311.19	0.53284		312	135	312	107	313	295		0.432692	0.342949	0.942492
314	prum-alignment-L314	0.39678	0.24162	0.21788	0.14371	567.81	0.4595		0.32503	0.28668	0.16222	0.22607	568.72	0.4489		0.23675	0.26427	0.24259	0.25639	567.89	0.50686		572	105	573	59	573	427		0.183566	0.102967	0.745201
315	prum-alignment-L315	0.32643	0.1683	0.27333	0.23194	569.68	0.44163		0.32882	0.18562	0.1682	0.31736	568.9	0.35382		0.28215	0.17006	0.2046	0.3432	568.77	0.37466		574	259	573	195	573	522		0.45122	0.340314	0.910995
316	prum-alignment-L316	0.33773	0.2254	0.28328	0.15359	594.59	0.50868		0.37657	0.29891	0.11126	0.21326	595.43	0.41017		0.24821	0.23583	0.26321	0.25274	595.21	0.49904		598	98	599	50	599	519		0.16388	0.0834725	0.866444
317	prum-alignment-L317	0.30271	0.24799	0.35431	0.09499	260.7	0.6023		0.3209	0.30795	0.15139	0.21975	261.72	0.45934		0.19232	0.31388	0.30636	0.18744	261.49	0.62024		263	91	264	51	264	235		0.346008	0.193182	0.890152
318	prum-alignment-L318	0.30834	0.23721	0.21811	0.23634	360.75	0.45532		0.3044	0.37886	0.15559	0.16115	361.74	0.53445		0.16	0.36726	0.25713	0.21561	360.43	0.62439		366	105	367	44	366	343		0.286885	0.119891	0.937158
319	prum-alignment-L319	0.29897	0.23385	0.27448	0.1927	489.66	0.50833		0.33218	0.22981	0.15383	0.28418	489.67	0.38364		0.24658	0.18964	0.26567	0.29811	489.54	0.45531		503	282	503	216	503	483		0.560636	0.429423	0.960239
320	prum-alignment-L320	0.30361	0.2744	0.25897	0.16301	445.46	0.53337		0.37109	0.19776	0.19358	0.23757	446.43	0.39134		0.20881	0.27386	0.28637	0.23096	445.28	0.56023		447	75	448	19	447	400		0.167785	0.0424107	0.894855
321	prum-alignment-L321	0.292	0.1931	0.31852	0.19638	501.17	0.51162		0.35099	0.2641	0.16476	0.22015	502.07	0.42886		0.30151	0.20892	0.20888	0.2807	501.99	0.4178		503	151	504	98	504	385		0.300199	0.194444	0.763889
322	prum-alignment-L322	0.369	0.1847	0.26408	0.18222	562.49	0.44878		0.37156	0.2571	0.16033	0.21102	563.35	0.41743		0.28561	0.22638	0.19344	0.29457	563.05	0.41982		568	61	569	28	569	480		0.107394	0.0492091	0.843585
325	prum-alignment-L325	0.33979	0.24132	0.23972	0.17917	512.05	0.48104		0.31151	0.22533	0.15006	0.31311	512.04	0.37539		0.23457	0.27892	0.20248	0.28402	510.89	0.4814		514	87	514	43	513	401		0.169261	0.0836576	0.781676
327	prum-alignment-L327	0.31	0.35093	0.21672	0.12235	461.47	0.56765		0.29887	0.34968	0.15689	0.19455	462.43	0.50657		0.29438	0.16615	0.23019	0.30928	461.36	0.39634		465	200	466	148	465	449		0.430108	0.317597	0.965591
328	prum-alignment-L328	0.29442	0.24282	0.35165	0.11111	554.17	0.59447		0.34281	0.17654	0.18742	0.29324	553.44	0.36396		0.09927	0.39094	0.40209	0.1077	552.99	0.79303		559	207	558	117	558	520		0.370304	0.209677	0.9319
329	prum-alignment-L329	0.29231	0.25543	0.26622	0.18604	579.64	0.52165		0.33065	0.28037	0.14909	0.23989	579.67	0.42946		0.25201	0.21355	0.24157	0.29288	578.66	0.45512		584	117	584	49	583	508		0.200342	0.0839041	0.871355
330	prum-alignment-L330	0.31315	0.23758	0.26968	0.17959	468.18	0.50726		0.35864	0.29031	0.12785	0.2232	468.19	0.41816		0.29834	0.23115	0.2138	0.25671	468.92	0.44495		470	96	470	64	471	349		0.204255	0.13617	0.740977
331	prum-alignment-L331	0.3032	0.24917	0.2824	0.16523	359.13	0.53157		0.35799	0.25818	0.1806	0.20322	359.17	0.43878		0.30118	0.21261	0.19319	0.29302	359.95	0.4058		367	219	367	212	368	353		0.59673	0.577657	0.959239
333	prum-alignment-L333	0.34726	0.25334	0.2514	0.148	558.85	0.50474		0.3454	0.26734	0.17531	0.21194	559.7	0.44265		0.27504	0.20358	0.23474	0.28664	558.62	0.43832		566	200	567	144	566	510		0.353357	0.253968	0.90106
334	prum-alignment-L334	0.29528	0.22485	0.31654	0.16332	311.27	0.54139		0.30558	0.28261	0.23412	0.17768	312.25	0.51673		0.09497	0.4634	0.29701	0.14462	312.08	0.76041		326	109	327	76	327	304		0.334356	0.232416	0.929664
335	prum-alignment-L335	0.26184	0.2398	0.3124	0.18597	508.27	0.5522		0.36507	0.2229	0.13223	0.2798	508.12	0.35513		0.21759	0.21794	0.28475	0.27973	507.16	0.50269		516	200	516	155	515	492		0.387597	0.300388	0.95534
336	prum-alignment-L336	0.34522	0.19494	0.27303	0.18681	380.69	0.46797		0.31035	0.20168	0.15465	0.33332	380.71	0.35633		0.18833	0.29143	0.26629	0.25395	381.49	0.55772		381	75	381	35	382	359		0.19685	0.0918635	0.939791
337	prum-alignment-L337	0.29864	0.24014	0.25937	0.20186	530.58	0.49951		0.39108	0.2297	0.16865	0.21057	531.42	0.39835		0.26617	0.20792	0.2191	0.3068	531.08	0.42702		539	139	540	106	540	509		0.257885	0.196296	0.942593
338	prum-alignment-L338	0.31109	0.21438	0.30459	0.16994	584.58	0.51897		0.29644	0.36458	0.15558	0.1834	584.51	0.52016		0.27889	0.17593	0.25611	0.28908	584.33	0.43204		587	235	587	208	587	562		0.400341	0.354344	0.957411
339	prum-alignment-L339	0.2372	0.23163	0.33512	0.19605	415.92	0.56675		0.20249	0.24775	0.1938	0.35596	415.94	0.44155		0.12286	0.37538	0.29513	0.20663	416.6	0.67051		419	141	419	89	420	391		0.336516	0.212411	0.930952
340	prum-alignment-L340	0.3334	0.23786	0.23931	0.18944	516.53	0.47717		0.28405	0.2423	0.17809	0.29556	516.47	0.42039		0.09313	0.41382	0.28901	0.20404	515.35	0.70283		519	101	519	42	518	480		0.194605	0.0809249	0.926641
341	prum-alignment-L341	0.28063	0.23725	0.33351	0.1486	492.07	0.57076		0.33402	0.28899	0.21133	0.16566	492.12	0.50032		0.26648	0.1775	0.27815	0.27788	491.99	0.45565		502	131	502	90	502	391		0.260956	0.179283	0.778884
342	prum-alignment-L342	0.28757	0.24217	0.28508	0.18518	573.46	0.52725		0.31145	0.31965	0.1832	0.1857	573.42	0.50285		0.17824	0.36843	0.26216	0.19117	572.99	0.63059		579	206	579	164	579	523		0.355786	0.283247	0.903282
343	prum-alignment-L343	0.27352	0.19085	0.31413	0.22151	368.19	0.50498		0.33074	0.18974	0.20865	0.27087	368.19	0.39839		0.25501	0.17877	0.22237	0.34385	368.14	0.40114		369	35	369	13	369	290		0.0948509	0.0352304	0.785908
346	prum-alignment-L346	0.28291	0.23102	0.30365	0.18242	498.16	0.53467		0.38747	0.23035	0.174	0.20818	498.29	0.40435		0.12834	0.367	0.36071	0.14395	497.07	0.72771		500	114	500	68	499	357		0.228	0.136	0.715431
347	prum-alignment-L347	0.35353	0.25788	0.20348	0.18512	373.82	0.46136		0.45102	0.16004	0.19143	0.19752	374.84	0.35147		0.24044	0.25057	0.24185	0.26714	374.57	0.49242		391	33	392	11	392	292		0.084399	0.0280612	0.744898
348	prum-alignment-L348	0.30033	0.22859	0.31488	0.1562	358.35	0.54347		0.31406	0.21822	0.24004	0.22768	358.31	0.45826		0.09514	0.40171	0.36427	0.13888	357.25	0.76598		361	79	361	37	360	321		0.218837	0.102493	0.891667
349	prum-alignment-L349	0.28966	0.23	0.29797	0.18237	120.38	0.52797		0.29133	0.19967	0.19171	0.3173	119.46	0.39138		0.10468	0.34129	0.35705	0.19697	119.39	0.69834		121	6	120	0	120	90		0.0495868	0	0.75
						Mean -->	0.52308						Mean -->	0.42347						Mean -->	0.519423							Mean -->		0.263085	0.172107	0.853467
						Min -->	0.37253						Min -->	0.25704						Min -->	0.25312							Min -->		0.0121951	0	0.188623
						L Quart -->	0.486347						L Quart -->	0.38164						L Quart -->	0.405665							L Quart -->		0.168057	0.0807401	0.817449
						Median -->	0.51705						Median -->	0.41865						Median -->	0.50138							Median -->		0.2433	0.136085	0.896333
						U Quart -->	0.551565						U Quart -->	0.458895						U Quart -->	0.595765							U Quart -->		0.339079	0.225442	0.932262
						Max -->	0.68338						Max -->	0.6861						Max -->	0.9674							Max -->		0.839827	0.746753	0.985816
						IQ range -->	0.0652175						IQ range -->	0.077255						IQ range -->	0.1901							IQ range -->		0.171022	0.144702	0.114814

## Sheet: Exon GC
#	Alignment Name	overall %GC	c1 %GC	c2 %GC	c3 %GC		c1 %inf	c2 %inf	c3 %inf
1	prum-alignment-L1	0.558407	0.52537	0.46902	0.68116		0.164882	0.0747863	0.745182
2	prum-alignment-L2	0.485606	0.48272	0.45542	0.5187		0.138132	0.0603113	0.797665
3	prum-alignment-L3	0.482833	0.54005	0.37664	0.53184		0.248963	0.197095	0.807054
4	prum-alignment-L4	0.612734	0.60978	0.51529	0.71319		0.276507	0.0892116	0.892116
5	prum-alignment-L5	0.408409	0.49156	0.3469	0.38672		0.287645	0.220077	0.947776
6	prum-alignment-L6	0.538243	0.56135	0.48127	0.57212		0.389328	0.225296	0.863636
7	prum-alignment-L7	0.50667	0.54971	0.50375	0.46655		0.208333	0.100346	0.9375
8	prum-alignment-L8	0.562181	0.53095	0.41303	0.74264		0.148387	0.083871	0.741935
9	prum-alignment-L9	0.431143	0.51515	0.43124	0.34701		0.345455	0.290909	0.793939
10	prum-alignment-L10	0.461665	0.48627	0.37967	0.51908		0.127341	0.0299625	0.857678
11	prum-alignment-L11	0.402025	0.46475	0.39226	0.34906		0.246085	0.111857	0.834452
12	prum-alignment-L12	0.463809	0.47778	0.491	0.42263		0.186099	0.0807175	0.912556
21	prum-alignment-L21	0.62188	0.54916	0.4168	0.89957		0.260536	0.137405	0.843511
22	prum-alignment-L22	0.608713	0.64246	0.51262	0.67102		0.166994	0.0492126	0.811024
24	prum-alignment-L24	0.513765	0.58406	0.54235	0.41463		0.291339	0.222441	0.972387
27	prum-alignment-L27	0.473686	0.54251	0.36719	0.51112		0.333333	0.152727	0.956364
28	prum-alignment-L28	0.439663	0.45776	0.39022	0.47102		0.245823	0.169451	0.885442
30	prum-alignment-L30	0.433552	0.47252	0.41088	0.41733		0.201794	0.105145	0.744966
31	prum-alignment-L31	0.424208	0.51567	0.41576	0.34119		0.289575	0.212355	0.92278
32	prum-alignment-L32	0.585559	0.53045	0.45882	0.76737		0.564477	0.36165	0.917476
34	prum-alignment-L34	0.46909	0.48554	0.4615	0.46021		0.422925	0.339921	0.936634
35	prum-alignment-L35	0.430389	0.47878	0.38768	0.4247		0.17801	0.113438	0.903846
36	prum-alignment-L36	0.56577	0.59956	0.6861	0.41151		0.2397	0.153558	0.546816
37	prum-alignment-L37	0.509277	0.57313	0.3643	0.59032		0.606936	0.434363	0.967181
38	prum-alignment-L38	0.408366	0.48873	0.44063	0.29555		0.208589	0.118852	0.893443
39	prum-alignment-L39	0.469479	0.43328	0.42592	0.54912		0.253876	0.155039	0.84913
41	prum-alignment-L41	0.446105	0.52473	0.41934	0.39438		0.0998004	0.0278884	0.697211
42	prum-alignment-L42	0.585868	0.57656	0.41831	0.76317		0.215686	0.0934783	0.862745
43	prum-alignment-L43	0.461865	0.50086	0.35423	0.53054		0.26078	0.170431	0.899384
44	prum-alignment-L44	0.42384	0.46976	0.33948	0.46229		0.184584	0.105477	0.920892
48	prum-alignment-L48	0.426285	0.52385	0.38251	0.37249		0.174194	0.0580645	0.737634
49	prum-alignment-L49	0.4654	0.52247	0.36281	0.51075		0.399209	0.271287	0.948617
50	prum-alignment-L50	0.474713	0.50712	0.37437	0.54247		0.389234	0.340249	0.917184
51	prum-alignment-L51	0.510049	0.59168	0.31087	0.62769		0.16129	0.0967742	0.817204
53	prum-alignment-L53	0.629788	0.61247	0.47493	0.80207		0.0922432	0.0334728	0.679916
54	prum-alignment-L54	0.516481	0.49588	0.37756	0.67613		0.217391	0.0958606	0.581699
57	prum-alignment-L57	0.439657	0.53764	0.27646	0.50489		0.107692	0.0615385	0.830769
58	prum-alignment-L58	0.429667	0.45916	0.40186	0.42803		0.0544747	0.0194175	0.405825
59	prum-alignment-L59	0.543293	0.5423	0.54031	0.54727		0.12406	0.0281426	0.701689
61	prum-alignment-L61	0.435512	0.52783	0.46377	0.31495		0.232779	0.142857	0.938242
62	prum-alignment-L62	0.415062	0.53981	0.42244	0.28288		0.283478	0.142361	0.932174
63	prum-alignment-L63	0.41283	0.52116	0.42528	0.29178		0.214815	0.160891	0.913366
64	prum-alignment-L64	0.408212	0.54633	0.42516	0.25312		0.210821	0.123134	0.91791
65	prum-alignment-L65	0.421442	0.48234	0.42501	0.35697		0.333333	0.248	0.88
67	prum-alignment-L67	0.438589	0.46603	0.4041	0.44564		0.325333	0.232	0.930667
72	prum-alignment-L72	0.596749	0.63041	0.61385	0.54595		0.294258	0.222488	0.911483
73	prum-alignment-L73	0.458123	0.45877	0.35374	0.5619		0.305714	0.168571	0.937143
74	prum-alignment-L74	0.521953	0.51926	0.48447	0.56216		0.273171	0.147059	0.882353
75	prum-alignment-L75	0.451267	0.56653	0.39464	0.39272		0.480545	0.418288	0.96699
76	prum-alignment-L76	0.635309	0.57436	0.47307	0.85815		0.362998	0.285714	0.920561
77	prum-alignment-L77	0.441875	0.56269	0.29732	0.46558		0.503185	0.404459	0.939683
78	prum-alignment-L78	0.488893	0.4284	0.35281	0.68555		0.249315	0.131507	0.90137
79	prum-alignment-L79	0.468364	0.48171	0.44882	0.47458		0.202381	0.05	0.916468
80	prum-alignment-L80	0.364458	0.45929	0.32033	0.31365		0.152425	0.0949074	0.907621
81	prum-alignment-L81	0.379984	0.51126	0.27115	0.35738		0.697936	0.548872	0.981238
82	prum-alignment-L82	0.493993	0.47849	0.49358	0.50992		0.284932	0.150685	0.90137
85	prum-alignment-L85	0.504298	0.50851	0.45345	0.55095		0.439236	0.373264	0.954861
86	prum-alignment-L86	0.4882	0.50648	0.51454	0.44363		0.245614	0.122807	0.937743
87	prum-alignment-L87	0.551772	0.5714	0.43881	0.64515		0.11194	0.0373134	0.682836
88	prum-alignment-L88	0.430137	0.49575	0.42032	0.37434		0.129353	0.0547264	0.753731
89	prum-alignment-L89	0.560428	0.50201	0.37001	0.80957		0.148883	0.0696517	0.830846
91	prum-alignment-L91	0.404134	0.43252	0.41899	0.36089		0.480357	0.410714	0.955357
94	prum-alignment-L94	0.599575	0.4842	0.41217	0.90289		0.285714	0.14741	0.729084
95	prum-alignment-L95	0.429106	0.47803	0.30489	0.50422		0.146006	0.0495868	0.868132
98	prum-alignment-L98	0.398076	0.48435	0.40348	0.30626		0.127334	0.0748299	0.539116
99	prum-alignment-L99	0.416659	0.44549	0.40153	0.40296		0.196154	0.109615	0.898077
100	prum-alignment-L100	0.459178	0.52537	0.4463	0.40598		0.502119	0.458774	0.966173
102	prum-alignment-L102	0.45254	0.53518	0.44153	0.38088		0.409341	0.409341	0.804945
103	prum-alignment-L103	0.468937	0.48911	0.38322	0.53457		0.225108	0.140389	0.937365
104	prum-alignment-L104	0.463987	0.54219	0.43513	0.41463		0.169557	0.0751445	0.924855
105	prum-alignment-L105	0.639914	0.6809	0.45798	0.78102		0.249471	0.120507	0.932347
107	prum-alignment-L107	0.462092	0.50811	0.43368	0.44441		0.25	0.148148	0.96649
108	prum-alignment-L108	0.459916	0.48375	0.40426	0.49182		0.209901	0.10099	0.90873
110	prum-alignment-L110	0.456544	0.53924	0.38135	0.44905		0.550432	0.504323	0.95389
111	prum-alignment-L111	0.484313	0.47433	0.54027	0.43831		0.546067	0.497758	0.966368
113	prum-alignment-L113	0.442084	0.49183	0.4241	0.41031		0.244231	0.180769	0.844231
116	prum-alignment-L116	0.577173	0.53674	0.43453	0.7603		0.442697	0.310112	0.948315
118	prum-alignment-L118	0.437446	0.58044	0.43422	0.29635		0.1875	0.207207	0.891892
119	prum-alignment-L119	0.449351	0.46505	0.54629	0.33664		0.306383	0.212766	0.929787
120	prum-alignment-L120	0.556525	0.56118	0.46979	0.63861		0.240506	0.0808081	0.916667
121	prum-alignment-L121	0.418803	0.49685	0.4465	0.31305		0.473498	0.379859	0.94523
122	prum-alignment-L122	0.501785	0.51587	0.55968	0.4299		0.341373	0.237918	0.818182
125	prum-alignment-L125	0.498415	0.50694	0.40128	0.58708		0.377246	0.239521	0.96008
126	prum-alignment-L126	0.604938	0.54699	0.4445	0.82313		0.16309	0.0858369	0.897216
127	prum-alignment-L127	0.4745	0.53751	0.35824	0.52795		0.273043	0.138889	0.956522
128	prum-alignment-L128	0.459499	0.52212	0.40484	0.45151		0.0650685	0.0205479	0.508591
129	prum-alignment-L129	0.473736	0.56582	0.40227	0.45312		0.321962	0.185501	0.895522
130	prum-alignment-L130	0.520791	0.53008	0.41191	0.62045		0.171756	0.108779	0.849237
131	prum-alignment-L131	0.419058	0.50818	0.25704	0.49215		0.177843	0.0932945	0.795322
133	prum-alignment-L133	0.436601	0.51644	0.46252	0.33062		0.340996	0.245211	0.96929
134	prum-alignment-L134	0.61948	0.62337	0.48839	0.74675		0.262712	0.108051	0.824153
135	prum-alignment-L135	0.534069	0.57022	0.4364	0.59572		0.560311	0.472763	0.939571
136	prum-alignment-L136	0.442935	0.53777	0.44448	0.34654		0.222222	0.128748	0.763668
137	prum-alignment-L137	0.40787	0.47053	0.3487	0.40453		0.196931	0.109694	0.882353
141	prum-alignment-L141	0.476688	0.52484	0.45323	0.45219		0.235537	0.127572	0.917695
142	prum-alignment-L142	0.437809	0.52855	0.34033	0.4447		0.212476	0.101167	0.902724
143	prum-alignment-L143	0.518135	0.37253	0.45892	0.723		0.112245	0.0918367	0.744898
145	prum-alignment-L145	0.453719	0.50517	0.45158	0.40448		0.351816	0.204589	0.912214
146	prum-alignment-L146	0.446345	0.48237	0.43417	0.42249		0.290268	0.182886	0.86745
147	prum-alignment-L147	0.410985	0.51995	0.39476	0.31824		0.374749	0.276553	0.903808
148	prum-alignment-L148	0.518602	0.43771	0.42734	0.69115		0.0709677	0.0257235	0.796774
149	prum-alignment-L149	0.453908	0.49669	0.42821	0.43675		0.456204	0.402194	0.967093
150	prum-alignment-L150	0.432327	0.56363	0.43181	0.30134		0.447496	0.478964	0.961165
151	prum-alignment-L151	0.423005	0.56023	0.28486	0.42412		0.433333	0.287215	0.957895
152	prum-alignment-L152	0.519355	0.55175	0.3936	0.61272		0.0478873	0.0056338	0.43662
153	prum-alignment-L153	0.513656	0.50971	0.41269	0.61864		0.139073	0.0660066	0.844884
154	prum-alignment-L154	0.573596	0.50069	0.41733	0.80328		0.164436	0.0803059	0.741379
155	prum-alignment-L155	0.48134	0.58433	0.49421	0.36544		0.268859	0.122093	0.920696
157	prum-alignment-L157	0.528086	0.50845	0.49523	0.5806		0.370203	0.325056	0.869074
158	prum-alignment-L158	0.455107	0.52734	0.46834	0.36964		0.194631	0.0823529	0.879195
159	prum-alignment-L159	0.391405	0.42924	0.36357	0.38147		0.342723	0.215457	0.9274
161	prum-alignment-L161	0.449084	0.51124	0.48252	0.35335		0.392015	0.309091	0.810909
162	prum-alignment-L162	0.496859	0.47362	0.37339	0.6437		0.152672	0.0737913	0.852417
163	prum-alignment-L163	0.675339	0.65748	0.40115	0.9674		0.194915	0.112994	0.700565
165	prum-alignment-L165	0.567726	0.59709	0.51018	0.59578		0.32381	0.272727	0.76555
169	prum-alignment-L169	0.52061	0.51082	0.46949	0.58157		0.124324	0.0378378	0.781081
170	prum-alignment-L170	0.511305	0.62946	0.47012	0.43433		0.0926641	0.0501931	0.509653
171	prum-alignment-L171	0.481881	0.55363	0.45769	0.4343		0.0433145	0.0282486	0.670433
175	prum-alignment-L175	0.425235	0.50949	0.45201	0.31405		0.256499	0.135417	0.932292
176	prum-alignment-L176	0.441752	0.55203	0.37909	0.39431		0.23133	0.0981818	0.930909
177	prum-alignment-L177	0.442292	0.49296	0.42829	0.40562		0.226306	0.11412	0.893617
178	prum-alignment-L178	0.476624	0.51788	0.44246	0.46953		0.331579	0.207018	0.950877
180	prum-alignment-L180	0.430816	0.47071	0.35029	0.47161		0.257812	0.107212	0.853516
181	prum-alignment-L181	0.504978	0.5458	0.40393	0.56537		0.372973	0.327338	0.944144
182	prum-alignment-L182	0.503186	0.52162	0.47236	0.51564		0.35	0.158879	0.962617
183	prum-alignment-L183	0.584955	0.60687	0.4256	0.72245		0.293532	0.181141	0.945409
184	prum-alignment-L184	0.433971	0.49645	0.53103	0.27441		0.839827	0.746753	0.967532
186	prum-alignment-L186	0.409696	0.47325	0.37868	0.37716		0.536885	0.467213	0.959016
187	prum-alignment-L187	0.481822	0.46334	0.49163	0.49048		0.325726	0.228216	0.962733
188	prum-alignment-L188	0.445245	0.54396	0.37833	0.41344		0.209756	0.0829268	0.9
189	prum-alignment-L189	0.400251	0.48097	0.37775	0.34198		0.223195	0.137856	0.870897
190	prum-alignment-L190	0.456895	0.51616	0.4017	0.45282		0.183333	0.06875	0.922917
192	prum-alignment-L192	0.477679	0.48382	0.41298	0.53608		0.180516	0.0744986	0.911429
193	prum-alignment-L193	0.62141	0.49838	0.46737	0.89965		0.109589	0.102041	0.664384
194	prum-alignment-L194	0.463293	0.4845	0.41815	0.48733		0.213198	0.114865	0.89527
195	prum-alignment-L195	0.537817	0.57358	0.40681	0.63299		0.217647	0.127451	0.943249
196	prum-alignment-L196	0.45486	0.51887	0.42231	0.42334		0.226824	0.12253	0.881657
197	prum-alignment-L197	0.508214	0.55101	0.41672	0.55708		0.168874	0.105611	0.851485
201	prum-alignment-L201	0.542686	0.57628	0.46748	0.58408		0.61204	0.516779	0.923077
202	prum-alignment-L202	0.420975	0.53314	0.41901	0.31095		0.239845	0.174081	0.640927
203	prum-alignment-L203	0.420146	0.52933	0.38108	0.34996		0.155172	0.10989	0.658307
204	prum-alignment-L204	0.494454	0.54148	0.40702	0.53494		0.326299	0.21718	0.855754
205	prum-alignment-L205	0.440409	0.55619	0.43209	0.33294		0.370763	0.271186	0.692797
206	prum-alignment-L206	0.570607	0.57105	0.57763	0.56314		0.415507	0.363095	0.946429
207	prum-alignment-L207	0.521326	0.56064	0.35063	0.65275		0.160121	0.0483384	0.89426
208	prum-alignment-L208	0.596364	0.59182	0.33275	0.86469		0.147287	0.0232558	0.844961
209	prum-alignment-L209	0.421967	0.51868	0.40207	0.34514		0.183575	0.10628	0.835749
211	prum-alignment-L211	0.502139	0.48535	0.4576	0.56346		0.4819	0.417607	0.85553
213	prum-alignment-L213	0.481244	0.4982	0.46974	0.47579		0.291601	0.212361	0.947702
216	prum-alignment-L216	0.457353	0.41197	0.51657	0.44351		0.572451	0.586762	0.973166
221	prum-alignment-L221	0.510387	0.55252	0.35736	0.62129		0.167513	0.0355932	0.89322
222	prum-alignment-L222	0.599805	0.53666	0.42848	0.83411		0.221957	0.0833333	0.854762
223	prum-alignment-L223	0.5568	0.42371	0.50069	0.74675		0.131579	0.207792	0.921053
224	prum-alignment-L224	0.515072	0.55406	0.41957	0.57163		0.129371	0.0244755	0.905594
225	prum-alignment-L225	0.471232	0.49429	0.51535	0.40438		0.0894737	0.0263158	0.424084
226	prum-alignment-L226	0.511841	0.53717	0.48127	0.51709		0.289256	0.138843	0.844628
228	prum-alignment-L228	0.469402	0.45344	0.34949	0.60541		0.113173	0.0260223	0.908922
229	prum-alignment-L229	0.48114	0.493	0.41827	0.53205		0.19086	0.094086	0.873995
230	prum-alignment-L230	0.483286	0.45714	0.41217	0.5806		0.106335	0.0384615	0.753394
231	prum-alignment-L231	0.499957	0.48658	0.54015	0.47322		0.205128	0.131868	0.868613
232	prum-alignment-L232	0.446915	0.54162	0.36036	0.43863		0.233677	0.0860585	0.969019
233	prum-alignment-L233	0.678279	0.68174	0.53108	0.82211		0.320463	0.262548	0.833977
234	prum-alignment-L234	0.489819	0.54611	0.39663	0.52675		0.290123	0.197531	0.890947
235	prum-alignment-L235	0.493054	0.52253	0.47533	0.48136		0.269397	0.156989	0.862366
239	prum-alignment-L239	0.620389	0.53612	0.49194	0.83246		0.33195	0.207469	0.859504
240	prum-alignment-L240	0.677649	0.62501	0.5759	0.83202		0.165984	0.0736196	0.635992
241	prum-alignment-L241	0.582402	0.5471	0.44962	0.75065		0.136882	0.0419048	0.897143
242	prum-alignment-L242	0.520311	0.5655	0.35644	0.63906		0.172603	0.0630137	0.882192
243	prum-alignment-L243	0.590339	0.55422	0.40544	0.81135		0.340081	0.189516	0.91129
244	prum-alignment-L244	0.468202	0.44639	0.40403	0.55393		0.225191	0.171756	0.825095
245	prum-alignment-L245	0.432127	0.51182	0.39554	0.38901		0.138554	0.0200803	0.89759
246	prum-alignment-L246	0.458056	0.51005	0.39401	0.47013		0.20751	0.0711462	0.826087
247	prum-alignment-L247	0.393163	0.4795	0.37236	0.32749		0.48	0.376	0.9499
248	prum-alignment-L248	0.479398	0.49094	0.44123	0.50606		0.250653	0.15625	0.869792
249	prum-alignment-L249	0.515963	0.55263	0.41482	0.58061		0.303502	0.170543	0.825581
250	prum-alignment-L250	0.472909	0.49588	0.38673	0.53614		0.2711	0.217391	0.907928
251	prum-alignment-L251	0.398437	0.49342	0.37826	0.3236		0.291161	0.164645	0.930676
252	prum-alignment-L252	0.414314	0.51459	0.37286	0.35557		0.311741	0.151515	0.90081
253	prum-alignment-L253	0.469907	0.48388	0.41416	0.51169		0.200599	0.0778443	0.757485
255	prum-alignment-L255	0.555778	0.67798	0.41589	0.57329		0.345133	0.235816	0.985816
256	prum-alignment-L256	0.408529	0.47934	0.43	0.31632		0.432056	0.347826	0.956522
257	prum-alignment-L257	0.584454	0.65741	0.42101	0.67512		0.106643	0.0191972	0.95986
258	prum-alignment-L258	0.429285	0.48191	0.47724	0.32866		0.222628	0.105839	0.917883
260	prum-alignment-L260	0.488248	0.58196	0.5329	0.34992		0.0239521	0	0.188623
261	prum-alignment-L261	0.499749	0.49657	0.47481	0.52787		0.0574713	0.0229358	0.568807
262	prum-alignment-L262	0.494405	0.49723	0.4366	0.54942		0.277136	0.200461	0.926267
264	prum-alignment-L264	0.471669	0.51706	0.36499	0.53307		0.141818	0.0527273	0.819672
265	prum-alignment-L265	0.513931	0.68338	0.35759	0.50463		0.121951	0.047619	0.902439
266	prum-alignment-L266	0.46452	0.4946	0.3989	0.50007		0.287582	0.22549	0.901961
267	prum-alignment-L267	0.372424	0.51088	0.27205	0.33441		0.39961	0.278752	0.963035
269	prum-alignment-L269	0.441654	0.58456	0.34534	0.39504		0.0779944	0.0111421	0.910864
270	prum-alignment-L270	0.463684	0.50696	0.46993	0.41414		0.352174	0.330435	0.969565
271	prum-alignment-L271	0.53605	0.56673	0.42285	0.61866		0.179541	0.122917	0.610417
272	prum-alignment-L272	0.480843	0.56617	0.33881	0.53836		0.0121951	0	0.304878
275	prum-alignment-L275	0.53563	0.59682	0.37326	0.63723		0.121212	0.0421687	0.909639
276	prum-alignment-L276	0.474115	0.51704	0.34707	0.55847		0.220615	0.106498	0.938517
277	prum-alignment-L277	0.481845	0.57891	0.31044	0.55663		0.142857	0.0775862	0.939655
279	prum-alignment-L279	0.494708	0.65091	0.44497	0.38877		0.472637	0.432836	0.925743
280	prum-alignment-L280	0.457806	0.59348	0.39547	0.38432		0.454902	0.435294	0.984283
281	prum-alignment-L281	0.465149	0.48593	0.46061	0.44895		0.189376	0.062212	0.847926
282	prum-alignment-L282	0.429534	0.53197	0.41143	0.34515		0.24237	0.129496	0.922801
288	prum-alignment-L288	0.57392	0.51691	0.37524	0.82971		0.110251	0.0193424	0.709865
289	prum-alignment-L289	0.453105	0.46081	0.38326	0.51537		0.274368	0.140794	0.934901
290	prum-alignment-L290	0.415229	0.48831	0.407	0.35035		0.282609	0.179842	0.782609
292	prum-alignment-L292	0.395233	0.49833	0.32344	0.36392		0.419753	0.26455	0.948854
293	prum-alignment-L293	0.481606	0.47594	0.40595	0.56296		0.0756646	0.0265306	0.614286
294	prum-alignment-L294	0.457122	0.49934	0.54307	0.32866		0.201592	0.0687831	0.909814
295	prum-alignment-L295	0.509005	0.54681	0.45114	0.52897		0.105882	0.0235756	0.727451
296	prum-alignment-L296	0.457112	0.4411	0.35858	0.57172		0.148	0.0918164	0.688623
297	prum-alignment-L297	0.542741	0.64371	0.27503	0.70995		0.299065	0.221963	0.850117
298	prum-alignment-L298	0.55587	0.56681	0.37923	0.72168		0.339934	0.269421	0.919008
301	prum-alignment-L301	0.561523	0.50502	0.3855	0.79388		0.449339	0.403509	0.907895
302	prum-alignment-L302	0.472148	0.4646	0.36754	0.58429		0.158537	0.0647773	0.821862
303	prum-alignment-L303	0.446914	0.49731	0.44353	0.39986		0.358607	0.283368	0.798768
305	prum-alignment-L305	0.687392	0.66739	0.48373	0.91117		0.276	0.183267	0.808765
306	prum-alignment-L306	0.534878	0.52055	0.60063	0.4835		0.150754	0.0954774	0.443144
307	prum-alignment-L307	0.586892	0.51803	0.45021	0.7925		0.307947	0.198675	0.903974
310	prum-alignment-L310	0.502049	0.47998	0.5015	0.52463		0.266409	0.19305	0.863198
311	prum-alignment-L311	0.471254	0.49297	0.38714	0.53367		0.0938967	0.0234742	0.774648
312	prum-alignment-L312	0.44444	0.47708	0.32319	0.53284		0.432692	0.342949	0.942492
314	prum-alignment-L314	0.471743	0.4595	0.4489	0.50686		0.183566	0.102967	0.745201
315	prum-alignment-L315	0.390061	0.44163	0.35382	0.37466		0.45122	0.340314	0.910995
316	prum-alignment-L316	0.47261	0.50868	0.41017	0.49904		0.16388	0.0834725	0.866444
317	prum-alignment-L317	0.560555	0.6023	0.45934	0.62024		0.346008	0.193182	0.890152
318	prum-alignment-L318	0.538025	0.45532	0.53445	0.62439		0.286885	0.119891	0.937158
319	prum-alignment-L319	0.449092	0.50833	0.38364	0.45531		0.560636	0.429423	0.960239
320	prum-alignment-L320	0.494896	0.53337	0.39134	0.56023		0.167785	0.0424107	0.894855
321	prum-alignment-L321	0.452727	0.51162	0.42886	0.4178		0.300199	0.194444	0.763889
322	prum-alignment-L322	0.428668	0.44878	0.41743	0.41982		0.107394	0.0492091	0.843585
325	prum-alignment-L325	0.445917	0.48104	0.37539	0.4814		0.169261	0.0836576	0.781676
327	prum-alignment-L327	0.490205	0.56765	0.50657	0.39634		0.430108	0.317597	0.965591
328	prum-alignment-L328	0.583768	0.59447	0.36396	0.79303		0.370304	0.209677	0.9319
329	prum-alignment-L329	0.46875	0.52165	0.42946	0.45512		0.200342	0.0839041	0.871355
330	prum-alignment-L330	0.456783	0.50726	0.41816	0.44495		0.204255	0.13617	0.740977
331	prum-alignment-L331	0.458676	0.53157	0.43878	0.4058		0.59673	0.577657	0.959239
333	prum-alignment-L333	0.461897	0.50474	0.44265	0.43832		0.353357	0.253968	0.90106
334	prum-alignment-L334	0.606217	0.54139	0.51673	0.76041		0.334356	0.232416	0.929664
335	prum-alignment-L335	0.469994	0.5522	0.35513	0.50269		0.387597	0.300388	0.95534
336	prum-alignment-L336	0.460739	0.46797	0.35633	0.55772		0.19685	0.0918635	0.939791
337	prum-alignment-L337	0.441599	0.49951	0.39835	0.42702		0.257885	0.196296	0.942593
338	prum-alignment-L338	0.490397	0.51897	0.52016	0.43204		0.400341	0.354344	0.957411
339	prum-alignment-L339	0.559662	0.56675	0.44155	0.67051		0.336516	0.212411	0.930952
340	prum-alignment-L340	0.533339	0.47717	0.42039	0.70283		0.194605	0.0809249	0.926641
341	prum-alignment-L341	0.508913	0.57076	0.50032	0.45565		0.260956	0.179283	0.778884
342	prum-alignment-L342	0.553543	0.52725	0.50285	0.63059		0.355786	0.283247	0.903282
343	prum-alignment-L343	0.434838	0.50498	0.39839	0.40114		0.0948509	0.0352304	0.785908
346	prum-alignment-L346	0.555438	0.53467	0.40435	0.72771		0.228	0.136	0.715431
347	prum-alignment-L347	0.435046	0.46136	0.35147	0.49242		0.084399	0.0280612	0.744898
348	prum-alignment-L348	0.589061	0.54347	0.45826	0.76598		0.218837	0.102493	0.891667
349	prum-alignment-L349	0.53917	0.52797	0.39138	0.69834		0.0495868	0	0.75
	Mean -->	0.488642	0.52308	0.42347	0.519423		0.263085	0.172107	0.853467
	Min -->	0.364458	0.37253	0.25704	0.25312		0.0121951	0	0.188623
	L Quart -->	0.442136	0.486347	0.38164	0.405665		0.168057	0.0807401	0.817449
	Median -->	0.473711	0.51705	0.41865	0.50138		0.2433	0.136085	0.896333
	U Quart -->	0.520746	0.551565	0.458895	0.595765		0.339079	0.225442	0.932262
	Max -->	0.687392	0.68338	0.6861	0.9674		0.839827	0.746753	0.985816
	IQ range -->	0.0786101	0.0652175	0.077255	0.1901		0.171022	0.144702	0.114814

## Sheet: Intron
#	Filename	Multiple_Introns	UTR_present	NC_nchar	Intron_nchar	Intron_inf	piA	piC	piG	piT	%GC	Charset_Name	Charset
48	prum-alignment-L48.longname.annotEB.wCODON.nex	2		223	223	212	0.31046	0.10296	0.14012	0.44646	0.24308	CHARSET Intron	1-92 1488-1618;				Summary of GC content for long introns:
260	prum-alignment-L260.longname.annotEB.wCODON.nex		1	596	124	45	0.31452	0.12786	0.11553	0.44209	0.24339	CHARSET Intron	1 - 124;
145	prum-alignment-L145.longname.annotEB.wCODON.nex			135	135	128	0.38838	0.10813	0.1417	0.36179	0.24983	CHARSET Intron	1571 - 1705;				Mean -->	0.397499
252	prum-alignment-L252.longname.annotEB.wCODON.nex	2		172	172	164	0.26616	0.11411	0.1469	0.47283	0.26101	CHARSET Intron	1 - 116 1600 - 1655;
343	prum-alignment-L343.longname.annotEB.wCODON.nex		1	282	90	66	0.29858	0.11425	0.15277	0.4344	0.26702	CHARSET Intron	1 - 90;				Min -->	0.24308
9	prum-alignment-L9.longname.annotEB.wCODON.nex			203	203	142	0.32114	0.15726	0.11542	0.40617	0.27268	CHARSET Intron	1486 - 1688;				L Quart -->	0.33783
63	prum-alignment-L63.longname.annotEB.wCODON.nex	4		426	426	396	0.30591	0.13773	0.13853	0.41784	0.27626	CHARSET Intron	44 - 146 438 - 531 820 - 988 1580 - 1639;				Median -->	0.38244
247	prum-alignment-L247.longname.annotEB.wCODON.nex	2		107	107	101	0.29314	0.15194	0.12698	0.42794	0.27892	CHARSET Intron	1 - 90 1590 - 1606;				U Quart -->	0.43548
64	prum-alignment-L64.longname.annotEB.wCODON.nex			96	96	83	0.20009	0.17278	0.10865	0.51848	0.28143	CHARSET Intron	75 - 170;				Max -->	0.74612
12	prum-alignment-L12.longname.annotEB.wCODON.nex		1	319	117	111	0.34223	0.15674	0.13229	0.36874	0.28903	CHARSET Intron	1 - 117;
279	prum-alignment-L279.longname.annotEB.wCODON.nex	2		262	262	241	0.34552	0.1388	0.15251	0.36318	0.29131	CHARSET Intron	1 - 125 730 - 866;				IQ range -->	0.09765
196	prum-alignment-L196.longname.annotEB.wCODON.nex			179	179	169	0.29918	0.15818	0.13405	0.4086	0.29223	CHARSET Intron	1 - 179;
258	prum-alignment-L258.longname.annotEB.wCODON.nex	2		223	223	216	0.31142	0.13765	0.15567	0.39526	0.29332	CHARSET Intron	1 - 129 1774 - 1867;
270	prum-alignment-L270.longname.annotEB.wCODON.nex			139	139	135	0.33425	0.16953	0.12418	0.37204	0.29371	CHARSET Intron	1 - 139;
121	prum-alignment-L121.longname.annotEB.wCODON.nex	2		239	239	231	0.27094	0.13922	0.15633	0.43351	0.29555	CHARSET Intron	1 - 114 1813 - 1937;
290	prum-alignment-L290.longname.annotEB.wCODON.nex			141	141	135	0.29335	0.11741	0.18548	0.40376	0.30289	CHARSET Intron	1 - 141;
272	prum-alignment-L272.longname.annotEB.wCODON.nex			71	71	56	0.27477	0.14385	0.16165	0.41973	0.3055	CHARSET Intron	1 - 71;
147	prum-alignment-L147.longname.annotEB.wCODON.nex			139	139	135	0.28124	0.13283	0.17332	0.41262	0.30615	CHARSET Intron	1498 - 1636;
38	prum-alignment-L38.longname.annotEB.wCODON.nex		1	208	130	123	0.3018	0.14299	0.1643	0.3909	0.30729	CHARSET Intron	1544 - 1673;
320	prum-alignment-L320.longname.annotEB.wCODON.nex			291	291	245	0.33231	0.14058	0.16679	0.36033	0.30737	CHARSET Intron	1 - 291;
155	prum-alignment-L155.longname.annotEB.wCODON.nex			123	123	116	0.26423	0.10064	0.20677	0.42835	0.30741	CHARSET Intron	1551 - 1673;
5	prum-alignment-L5.longname.annotEB.wCODON.nex			81	81	78	0.29171	0.136	0.17896	0.39334	0.31496	CHARSET Intron	1 - 81;
161	prum-alignment-L161.longname.annotEB.wCODON.nex	2		313	313	285	0.25719	0.16946	0.14616	0.42719	0.31562	CHARSET Intron	1 - 152 1804 - 1964;
65	prum-alignment-L65.longname.annotEB.wCODON.nex	5		501	501	455	0.26575	0.16602	0.15145	0.41677	0.31747	CHARSET Intron	1 - 68 357 - 499 779 - 863 1143 - 1240 1520 - 1626;
149	prum-alignment-L149.longname.annotEB.wCODON.nex			165	165	156	0.27198	0.15061	0.16774	0.40968	0.31835	CHARSET Intron	1643 - 1807;
190	prum-alignment-L190.longname.annotEB.wCODON.nex		1	218	113	108	0.25246	0.17293	0.14735	0.42727	0.32028	CHARSET Intron	1 - 113;
7	prum-alignment-L7.longname.annotEB.wCODON.nex			167	167	163	0.23027	0.16708	0.15352	0.44914	0.3206	CHARSET Intron	1 - 167;
235	prum-alignment-L235.longname.annotEB.wCODON.nex		1	299	145	142	0.29207	0.15293	0.16809	0.38692	0.32102	CHARSET Intron	1 - 145;
61	prum-alignment-L61.longname.annotEB.wCODON.nex			78	78	69	0.22513	0.17863	0.14375	0.45249	0.32238	CHARSET Intron	27 - 104;
131	prum-alignment-L131.longname.annotEB.wCODON.nex			105	105	101	0.23222	0.11483	0.21275	0.4402	0.32758	CHARSET Intron	1 - 105;
282	prum-alignment-L282.longname.annotEB.wCODON.nex	2		274	274	253	0.33477	0.15516	0.17359	0.33648	0.32875	CHARSET Intron	1 - 139 1810 - 1944;
293	prum-alignment-L293.longname.annotEB.wCODON.nex			272	272	173	0.25615	0.15794	0.17113	0.41478	0.32907	CHARSET Intron	1-272;
231	prum-alignment-L231.longname.annotEB.wCODON.nex		1	687	161	157	0.31701	0.17129	0.15841	0.35329	0.3297	CHARSET Intron	1 - 161;
230	prum-alignment-L230.longname.annotEB.wCODON.nex		1	336	164	142	0.23474	0.1829	0.14729	0.43507	0.33019	CHARSET Intron	1 - 164;
267	prum-alignment-L267.longname.annotEB.wCODON.nex			119	119	116	0.25531	0.15845	0.17227	0.41397	0.33072	CHARSET Intron	1541 - 1659;
209	prum-alignment-L209.longname.annotEB.wCODON.nex		1	464	180	177	0.32891	0.1393	0.19282	0.33897	0.33212	CHARSET Intron	906 - 1085;
129	prum-alignment-L129.longname.annotEB.wCODON.nex	2		238	238	228	0.3292	0.13356	0.20124	0.336	0.3348	CHARSET Intron	1 - 110 1518 - 1645;
188	prum-alignment-L188.longname.annotEB.wCODON.nex		1	303	166	161	0.31023	0.13702	0.19907	0.35368	0.33609	CHARSET Intron	1 - 166;
202	prum-alignment-L202.longname.annotEB.wCODON.nex			146	146	142	0.30734	0.14533	0.19114	0.35619	0.33647	CHARSET Intron	1553 - 1698;
103	prum-alignment-L103.longname.annotEB.wCODON.nex		1	298	152	149	0.2294	0.18146	0.15579	0.43335	0.33725	CHARSET Intron	1 - 152;
312	prum-alignment-L312.longname.annotEB.wCODON.nex			473	473	406	0.3194	0.14712	0.19071	0.34278	0.33783	CHARSET Intron	938 - 1410;
37	prum-alignment-L37.longname.annotEB.wCODON.nex			67	67	64	0.17988	0.16016	0.17857	0.48139	0.33873	CHARSET Intron	1 - 67;
10	prum-alignment-L10.longname.annotEB.wCODON.nex	2		392	392	269	0.26379	0.15636	0.18349	0.39636	0.33985	CHARSET Intron	1-220 1022-1193;
250	prum-alignment-L250.longname.annotEB.wCODON.nex		1	351	177	163	0.24402	0.14806	0.19224	0.41567	0.3403	CHARSET Intron	1 - 177;
336	prum-alignment-L336.longname.annotEB.wCODON.nex		1	304	129	121	0.19099	0.19881	0.14425	0.46595	0.34306	CHARSET Intron	1 - 129;
177	prum-alignment-L177.longname.annotEB.wCODON.nex			171	171	161	0.27602	0.17079	0.17265	0.38055	0.34344	CHARSET Intron	1 - 171;
11	prum-alignment-L11.longname.annotEB.wCODON.nex			441	441	290	0.35106	0.14761	0.19614	0.30519	0.34375	CHARSET Intron	800 - 1240;
294	prum-alignment-L294.longname.annotEB.wCODON.nex	2		341	341	332	0.29484	0.15689	0.18896	0.35932	0.34585	CHARSET Intron	1 - 164 1297 - 1473;
246	prum-alignment-L246.longname.annotEB.wCODON.nex			199	199	189	0.28616	0.12046	0.22748	0.3659	0.34794	CHARSET Intron	1 - 199;
245	prum-alignment-L245.longname.annotEB.wCODON.nex	2		285	285	278	0.31204	0.16115	0.18699	0.33982	0.34814	CHARSET Intron	1 - 153 1648 - 1779;
317	prum-alignment-L317.longname.annotEB.wCODON.nex			638	638	290	0.33339	0.13868	0.2106	0.31733	0.34928	CHARSET Intron	1 - 638;
347	prum-alignment-L347.longname.annotEB.wCODON.nex		1	491	178	111	0.27902	0.15473	0.19563	0.37062	0.35036	CHARSET Intron	1 - 178;
269	prum-alignment-L269.longname.annotEB.wCODON.nex	2		321	321	316	0.27333	0.14235	0.20974	0.37458	0.35209	CHARSET Intron	1 - 188 1266 - 1398;
113	prum-alignment-L113.longname.annotEB.wCODON.nex	2		397	397	330	0.24205	0.21583	0.13748	0.40464	0.35331	CHARSET Intron	1 - 250 1811 - 1957;
171	prum-alignment-L171.longname.annotEB.wCODON.nex	2		397	397	382	0.26218	0.15375	0.20026	0.38382	0.35401	CHARSET Intron	1 - 168 1762 - 1990;
58	prum-alignment-L58.longname.annotEB.wCODON.nex			190	190	186	0.32942	0.16379	0.1908	0.31599	0.35459	CHARSET Intron	1545 - 1734;
248	prum-alignment-L248.longname.annotEB.wCODON.nex		1	394	182	176	0.27555	0.2093	0.14545	0.3697	0.35475	CHARSET Intron	1 - 182;
180	prum-alignment-L180.longname.annotEB.wCODON.nex			149	149	138	0.32686	0.14398	0.21194	0.31722	0.35592	CHARSET Intron	1 - 149;
118	prum-alignment-L118.longname.annotEB.wCODON.nex			680	170	163	0.2266	0.16981	0.18779	0.4158	0.3576	CHARSET Intron	845 - 1014;
210	prum-alignment-L210.longname.annotEB.noncoding.nex			1404	1404	521	0.32677	0.15809	0.20059	0.31455	0.35868	CHARSET Intron	1 - 1404; [ conserved region in intron ]
136	prum-alignment-L136.longname.annotEB.wCODON.nex	2		357	357	344	0.31057	0.13821	0.22159	0.32962	0.3598	CHARSET Intron	1 - 178 1880 - 2058;
122	prum-alignment-L122.longname.annotEB.wCODON.nex	2		330	330	320	0.33076	0.16028	0.20032	0.30864	0.3606	CHARSET Intron	1 - 180 1797 - 1946;
28	prum-alignment-L28.longname.annotEB.wCODON.nex		1	346	186	144	0.35185	0.18877	0.17184	0.28753	0.36061	CHARSET Intron	1 - 186;
137	prum-alignment-L137.longname.annotEB.wCODON.nex	2		363	363	339	0.30099	0.13328	0.22877	0.33696	0.36205	CHARSET Intron	1 - 185 1360 - 1537;
187	prum-alignment-L187.longname.annotEB.wCODON.nex		1	219	155	153	0.23449	0.16673	0.19657	0.4022	0.3633	CHARSET Intron	1 - 155;
341	prum-alignment-L341.longname.annotEB.wCODON.nex			222	222	213	0.25258	0.2137	0.14984	0.38389	0.36354	CHARSET Intron	1507 - 1728;
165	prum-alignment-L165.longname.annotEB.wCODON.nex		1	856	60	50	0.2624	0.13422	0.23286	0.37052	0.36708	CHARSET Intron	1425 - 1484;
54	prum-alignment-L54.longname.annotEB.wCODON.nex			123	123	55	0.16696	0.16029	0.20706	0.46568	0.36735	CHARSET Intron	1 - 123;
95	prum-alignment-L95.longname.annotEB.wCODON.nex		1	361	176	150	0.2915	0.16091	0.2082	0.33938	0.36911	CHARSET Intron	1 - 176;
174	prum-alignment-L174.longname.annotEB.noncoding.nex			901	901	642	0.29045	0.19423	0.17569	0.33962	0.36992	CHARSET Intron	1 - 901; [ Conserved region in intron ]
225	prum-alignment-L225.longname.annotEB.wCODON.nex		1	397	205	193	0.26884	0.18007	0.19226	0.35882	0.37233	CHARSET Intron	1 - 205;
31	prum-alignment-L31.longname.annotEB.wCODON.nex			189	189	182	0.29773	0.15152	0.2218	0.32896	0.37332	CHARSET Intron	1555 - 1743;
234	prum-alignment-L234.longname.annotEB.wCODON.nex	2		227	227	211	0.23814	0.20502	0.16834	0.38851	0.37336	CHARSET Intron	1 - 174 1633 - 1685;
57	prum-alignment-L57.longname.annotEB.wCODON.nex		1	671	189	183	0.28034	0.14892	0.22556	0.34518	0.37448	CHARSET Intron	678 - 866;
143	prum-alignment-L143.longname.annotEB.wCODON.nex		1	1291	184	176	0.27589	0.20323	0.17387	0.347	0.3771	CHARSET Intron	1 - 184;
36	prum-alignment-L36.longname.annotEB.wCODON.nex	2		548	548	345	0.29086	0.20142	0.17759	0.33014	0.37901	CHARSET Intron	1-330 1132-1349;
217	prum-alignment-L217.longname.annotEB.noncoding.nex			937	937	509	0.31135	0.19554	0.18515	0.30796	0.38069	CHARSET Intron	1 - 937; [ conserved region in intron ]
170	prum-alignment-L170.longname.annotEB.wCODON.nex			221	221	214	0.27531	0.15857	0.22218	0.34394	0.38075	CHARSET Intron	1555 - 1775;
219	prum-alignment-L219.longname.annotEB.noncoding.nex			724	724	333	0.31753	0.18907	0.19262	0.30078	0.38169	CHARSET Intron	1 - 724; [ conserved region in intron ]
128	prum-alignment-L128.longname.annotEB.wCODON.nex	2		444	444	321	0.27315	0.1808	0.20092	0.34513	0.38172	CHARSET Intron	1 - 210 1086 - 1319;
261	prum-alignment-L261.longname.annotEB.wCODON.nex		1	437	198	188	0.29503	0.19628	0.18616	0.32253	0.38244	CHARSET Intron	1 - 198;
192	prum-alignment-L192.longname.annotEB.wCODON.nex	2		312	312	304	0.28388	0.21486	0.17021	0.33105	0.38507	CHARSET Intron	1 - 140 1189 - 1360;
266	prum-alignment-L266.longname.annotEB.wCODON.nex	2		350	350	326	0.27803	0.18385	0.20262	0.33549	0.38647	CHARSET Intron	1 - 161 1998 - 2186;
148	prum-alignment-L148.longname.annotEB.wCODON.nex	2		398	398	364	0.25718	0.20285	0.18575	0.35422	0.3886	CHARSET Intron	1 - 182 1114 - 1329;
271	prum-alignment-L271.longname.annotEB.wCODON.nex		1	175	136	44	0.25294	0.18695	0.20196	0.35815	0.38891	CHARSET Intron	1 - 136;
327	prum-alignment-L327.longname.annotEB.wCODON.nex			145	145	142	0.21756	0.20904	0.18006	0.39334	0.3891	CHARSET Intron	1 - 145;
67	prum-alignment-L67.longname.annotEB.wCODON.nex	5		598	598	521	0.2771	0.20883	0.18143	0.33265	0.39026	CHARSET Intron	1- 139 419- 559 839- 929 1209- 1330 1619- 1723;
24	prum-alignment-L24.longname.annotEB.wCODON.nex			166	166	162	0.25471	0.16615	0.22416	0.35498	0.39031	CHARSET Intron	1524 - 1689;
228	prum-alignment-L228.longname.annotEB.wCODON.nex	2		217	217	207	0.26481	0.21078	0.18003	0.34438	0.39081	CHARSET Intron	1 - 163 1779 - 1832;
182	prum-alignment-L182.longname.annotEB.wCODON.nex		1	1027	116	110	0.21765	0.24116	0.15104	0.39015	0.3922	CHARSET Intron	1 - 116;
50	prum-alignment-L50.longname.annotEB.wCODON.nex			118	118	108	0.19308	0.16186	0.2308	0.41427	0.39266	CHARSET Intron	1449-1566;
176	prum-alignment-L176.longname.annotEB.wCODON.nex		1	260	142	127	0.2624	0.19813	0.19653	0.34295	0.39466	CHARSET Intron	1 - 142;
229	prum-alignment-L229.longname.annotEB.wCODON.nex		1	484	172	161	0.26795	0.19932	0.19536	0.33738	0.39468	CHARSET Intron	1 - 172;
79	prum-alignment-L79.longname.annotEB.wCODON.nex		1	308	167	161	0.25865	0.17951	0.21775	0.34408	0.39726	CHARSET Intron	1401 - 1567;
102	prum-alignment-L102.longname.annotEB.wCODON.nex			259	259	190	0.16647	0.1537	0.24446	0.43537	0.39816	CHARSET Intron	1093 - 1351;
249	prum-alignment-L249.longname.annotEB.wCODON.nex		1	214	82	78	0.22249	0.2155	0.184	0.378	0.3995	CHARSET Intron	1 - 82;
49	prum-alignment-L49.longname.annotEB.wCODON.nex			92	92	88	0.26557	0.17637	0.22331	0.33475	0.39968	CHARSET Intron	1518 - 1609;
59	prum-alignment-L59.longname.annotEB.wCODON.nex			219	219	208	0.27987	0.18765	0.2126	0.31988	0.40025	CHARSET Intron	1 - 219;
237	prum-alignment-L237.longname.annotEB.noncoding.nex			821	821	393	0.28753	0.20868	0.19249	0.3113	0.40117	CHARSET Intron	1 - 821; [ conserved region in intron ]
311	prum-alignment-L311.longname.annotEB.wCODON.nex			497	497	375	0.25945	0.20535	0.19709	0.33811	0.40244	CHARSET Intron	1279 - 1775;
310	prum-alignment-L310.longname.annotEB.wCODON.nex	2		125	125	93	0.2079	0.22421	0.17975	0.38814	0.40396	CHARSET Intron	1 - 34 1590 - 1680;
297	prum-alignment-L297.longname.annotEB.wCODON.nex			273	273	160	0.29197	0.17376	0.23359	0.30068	0.40735	CHARSET Intron	1 - 273;
215	prum-alignment-L215.longname.annotEB.noncoding.nex			1172	1172	561	0.28225	0.19109	0.21728	0.30938	0.40837	CHARSET Intron	1 - 1172; [ conserved region in intron ]
157	prum-alignment-L157.longname.annotEB.wCODON.nex			205	205	195	0.20505	0.227	0.18216	0.38579	0.40916	CHARSET Intron	1 - 205;
27	prum-alignment-L27.longname.annotEB.wCODON.nex		1	182	129	124	0.2751	0.22029	0.18957	0.31503	0.40986	CHARSET Intron	880 - 1008;
201	prum-alignment-L201.longname.annotEB.wCODON.nex			164	164	142	0.29361	0.24173	0.16928	0.29538	0.41101	CHARSET Intron	1 - 164;
207	prum-alignment-L207.longname.annotEB.wCODON.nex		1	424	196	192	0.28642	0.17363	0.23819	0.30176	0.41182	CHARSET Intron	1222 - 1417;
3	prum-alignment-L3.longname.annotEB.wCODON.nex		1	187	80	5	0.20349	0.13979	0.27595	0.38076	0.41574	CHARSET Intron	1-80;
197	prum-alignment-L197.longname.annotEB.wCODON.nex	2		353	353	334	0.27825	0.2066	0.21009	0.30507	0.41669	CHARSET Intron	1 - 171 1080 - 1261;
120	prum-alignment-L120.longname.annotEB.wCODON.nex		1	388	202	188	0.29722	0.22173	0.19845	0.28261	0.42018	CHARSET Intron	1 - 202;
153	prum-alignment-L153.longname.annotEB.wCODON.nex	3		1195	1195	722	0.2548	0.1908	0.23008	0.32431	0.42088	CHARSET Intron	1 - 149 943 - 1056 1172 - 2103;
141	prum-alignment-L141.longname.annotEB.wCODON.nex		1	474	190	181	0.21429	0.22353	0.1992	0.36298	0.42273	CHARSET Intron	1 - 190;
2	prum-alignment-L2.longname.annotEB.wCODON.nex			218	218	213	0.2413	0.22396	0.20322	0.33151	0.42718	CHARSET Intron	1 - 218;
205	prum-alignment-L205.longname.annotEB.wCODON.nex	2		271	271	219	0.31414	0.15775	0.27073	0.25738	0.42848	CHARSET Intron	1 - 97 1514 - 1687;
295	prum-alignment-L295.longname.annotEB.wCODON.nex			199	199	193	0.27943	0.20297	0.22592	0.29169	0.42889	CHARSET Intron	1530 - 1728;
6	prum-alignment-L6.longname.annotEB.wCODON.nex			164	164	127	0.25517	0.17161	0.25816	0.31507	0.42977	CHARSET Intron	1519 - 1682;
265	prum-alignment-L265.longname.annotEB.wCODON.nex	2		415	415	395	0.21864	0.2108	0.21913	0.35143	0.42993	CHARSET Intron	1 - 262 387 - 539;
242	prum-alignment-L242.longname.annotEB.wCODON.nex	2		305	305	286	0.25004	0.17336	0.25935	0.31724	0.43271	CHARSET Intron	1 - 159 1255 - 1400;
110	prum-alignment-L110.longname.annotEB.wCODON.nex	2		331	331	324	0.28611	0.18517	0.24775	0.28096	0.43292	CHARSET Intron	1 - 150 1192 - 1372;
213	prum-alignment-L213.longname.annotEB.wCODON.nex		1	420	221	149	0.28352	0.16244	0.27084	0.2832	0.43328	CHARSET Intron	1 - 221;
211	prum-alignment-L211.longname.annotEB.wCODON.nex			354	354	269	0.19361	0.24964	0.18584	0.37091	0.43548	CHARSET Intron	1 - 354;
281	prum-alignment-L281.longname.annotEB.wCODON.nex		1	422	178	164	0.27879	0.22282	0.21616	0.28223	0.43898	CHARSET Intron	1 - 178;
262	prum-alignment-L262.longname.annotEB.wCODON.nex		1	278	166	154	0.25965	0.21636	0.22455	0.29943	0.44091	CHARSET Intron	1 - 166;
338	prum-alignment-L338.longname.annotEB.wCODON.nex			162	162	159	0.23996	0.20585	0.23537	0.31883	0.44122	CHARSET Intron	1762 - 1923;
34	prum-alignment-L34.longname.annotEB.wCODON.nex	2		100	100	93	0.26128	0.19298	0.24873	0.297	0.44171	CHARSET Intron	1-13 1531-1617;
74	prum-alignment-L74.longname.annotEB.wCODON.nex	2		482	482	452	0.24872	0.24357	0.20101	0.3067	0.44458	CHARSET Intron	1 - 230 844 - 1095;
277	prum-alignment-L277.longname.annotEB.wCODON.nex		1	450	259	233	0.27513	0.16968	0.27862	0.27657	0.4483	CHARSET Intron	1 - 259;
130	prum-alignment-L130.longname.annotEB.wCODON.nex			198	198	195	0.24263	0.19342	0.2556	0.30835	0.44902	CHARSET Intron	1 - 198;
42	prum-alignment-L42.longname.annotEB.wCODON.nex			151	151	144	0.2943	0.22389	0.23202	0.24979	0.45591	CHARSET Intron	1379 - 1529;
1	prum-alignment-L1.longname.annotEB.wCODON.nex	2		192	192	135	0.19751	0.21638	0.24466	0.34144	0.46104	CHARSET Intron	1-81 1484-1594;
318	prum-alignment-L318.longname.annotEB.wCODON.nex	2		331	331	317	0.16692	0.25434	0.20895	0.36978	0.46329	CHARSET Intron	1 - 160 1260 - 1430;
241	prum-alignment-L241.longname.annotEB.wCODON.nex			161	161	151	0.18013	0.25536	0.20872	0.35578	0.46408	CHARSET Intron	1 - 161;
51	prum-alignment-L51.longname.annotEB.wCODON.nex	2		330	330	323	0.22194	0.20615	0.26173	0.31018	0.46788	CHARSET Intron	1- 150 430- 609;
94	prum-alignment-L94.longname.annotEB.wCODON.nex		1	92	91	87	0.18425	0.17182	0.30205	0.34188	0.47387	CHARSET Intron	756 - 846;
108	prum-alignment-L108.longname.annotEB.wCODON.nex			186	186	185	0.22917	0.25339	0.22418	0.29326	0.47757	CHARSET Intron	1515 - 1700;
125	prum-alignment-L125.longname.annotEB.wCODON.nex		1	140	108	103	0.1923	0.27692	0.2017	0.32908	0.47862	CHARSET Intron	1 - 108;
275	prum-alignment-L275.longname.annotEB.wCODON.nex	2	1	711	506	491	0.24231	0.21635	0.26278	0.27856	0.47913	CHARSET Intron	1 - 191 251 - 565;
335	prum-alignment-L335.longname.annotEB.wCODON.nex			136	136	134	0.19995	0.22596	0.25629	0.31779	0.48225	CHARSET Intron	1549 - 1684;
224	prum-alignment-L224.longname.annotEB.wCODON.nex		1	410	193	189	0.2411	0.23017	0.25427	0.27445	0.48444	CHARSET Intron	1 - 193;
87	prum-alignment-L87.longname.annotEB.wCODON.nex	2		194	194	184	0.2336	0.27371	0.21179	0.2809	0.4855	CHARSET Intron	1 - 90 1699 - 1802;
183	prum-alignment-L183.longname.annotEB.wCODON.nex			156	156	129	0.24637	0.29928	0.18889	0.26547	0.48817	CHARSET Intron	1209 - 1364;
334	prum-alignment-L334.longname.annotEB.wCODON.nex	2		188	188	179	0.19888	0.25256	0.2358	0.31276	0.48836	CHARSET Intron	1 - 32 1013 - 1168;
181	prum-alignment-L181.longname.annotEB.wCODON.nex			138	138	129	0.15105	0.24249	0.24938	0.35708	0.49187	CHARSET Intron	1 - 138;
76	prum-alignment-L76.longname.annotEB.wCODON.nex			178	178	174	0.22205	0.19311	0.31508	0.26976	0.50819	CHARSET Intron	1283 - 1460;
162	prum-alignment-L162.longname.annotEB.wCODON.nex		1	355	184	178	0.24992	0.31325	0.19641	0.24042	0.50966	CHARSET Intron	1351 - 1534;
222	prum-alignment-L222.longname.annotEB.wCODON.nex		1	405	203	177	0.20574	0.23927	0.28725	0.26775	0.52652	CHARSET Intron	1 - 203;
239	prum-alignment-L239.longname.annotEB.wCODON.nex			125	125	123	0.21022	0.2912	0.24391	0.25467	0.53511	CHARSET Intron	1 - 125;
243	prum-alignment-L243.longname.annotEB.wCODON.nex			221	221	199	0.19119	0.27039	0.27387	0.26455	0.54426	CHARSET Intron	744 - 964;
32	prum-alignment-L32.longname.annotEB.wCODON.nex		1	174	157	154	0.20808	0.24807	0.3062	0.23765	0.55427	CHARSET Intron	1 - 157;
135	prum-alignment-L135.longname.annotEB.wCODON.nex	2		87	87	81	0.16711	0.22563	0.33044	0.27681	0.55607	CHARSET Intron	1 - 5 1547 - 1628;
126	prum-alignment-L126.longname.annotEB.wCODON.nex		1	268	148	145	0.16793	0.30597	0.25092	0.27517	0.55689	CHARSET Intron	1 - 148;
89	prum-alignment-L89.longname.annotEB.wCODON.nex		1	218	179	176	0.12808	0.2685	0.28954	0.31388	0.55804	CHARSET Intron	1247 - 1425;
296	prum-alignment-L296.longname.annotEB.wCODON.nex			188	188	183	0.19162	0.28915	0.26935	0.24988	0.5585	CHARSET Intron	1 - 188;
22	prum-alignment-L22.longname.annotEB.wCODON.nex			181	181	177	0.15675	0.19815	0.3611	0.28401	0.55925	CHARSET Intron	1526 - 1706;
134	prum-alignment-L134.longname.annotEB.wCODON.nex			155	155	151	0.17975	0.26241	0.30827	0.24957	0.57068	CHARSET Intron	1417 - 1571;
233	prum-alignment-L233.longname.annotEB.wCODON.nex			69	69	63	0.17419	0.30776	0.3168	0.20125	0.62456	CHARSET Intron	1 - 69;
53	prum-alignment-L53.longname.annotEB.wCODON.nex			227	227	195	0.13826	0.28095	0.3487	0.23209	0.62965	CHARSET Intron	1 - 227;
208	prum-alignment-L208.longname.annotEB.wCODON.nex			63	63	61	0.09728	0.23755	0.39711	0.26806	0.63466	CHARSET Intron	388 - 450;
223	prum-alignment-L223.longname.annotEB.wCODON.nex	2		215	215	182	0.15088	0.32694	0.31634	0.20584	0.64328	CHARSET Intron	1 - 125 288 - 377;
21	prum-alignment-L21.longname.annotEB.wCODON.nex		1	105	101	97	0.14211	0.2916	0.38618	0.18011	0.67778	CHARSET Intron	1 - 101;
346	prum-alignment-L346.longname.annotEB.wCODON.nex			78	78	61	0.16805	0.34787	0.39825	0.08584	0.74612	CHARSET Intron	1500 - 1577;
4	prum-alignment-L4.longname.annotEB.wCODON.nex			48	48	42	0.21624	0.26791	0.21585	0.3	0.48376	CHARSET Intron	1446 - 1493;
41	prum-alignment-L41.longname.annotEB.wCODON.nex		1	170	46	41	0.14082	0.18181	0.16769	0.50968	0.3495	CHARSET Intron	1 - 46;
72	prum-alignment-L72.longname.annotEB.wCODON.nex		1	177	15	9	0.13939	0.50474	0.1367	0.21918	0.64144	CHARSET Intron	1 - 15;
105	prum-alignment-L105.longname.annotEB.wCODON.nex	2		42	42	34	0.03203	0.40545	0.39756	0.16497	0.80301	CHARSET Intron	1 - 42; [ only intron 1 included because intron2 is invariant GT ]
163	prum-alignment-L163.longname.annotEB.wCODON.nex		1	12	9	5	0.1286	0.15801	0.58104	0.13235	0.73905	CHARSET Intron	1066 - 1074;
193	prum-alignment-L193.longname.annotEB.wCODON.nex			33	33	17	0.13525	0.2924	0.35287	0.21948	0.64527	CHARSET Intron	1 - 33;
276	prum-alignment-L276.longname.annotEB.wCODON.nex			24	24	22	0.1124	0.41185	0.1916	0.28415	0.60345	CHARSET Intron	1 - 24;
339	prum-alignment-L339.longname.annotEB.wCODON.nex		1	40	21	17	0.09822	0.48493	0.06104	0.35581	0.54597	CHARSET Intron	1 - 21;
348	prum-alignment-L348.longname.annotEB.wCODON.nex			5	5	5	0.01576	0.3901	0.58566	0.00848	0.97576	CHARSET Intron	1 - 5;
	COMBINED SHORT INTRON DATA				243	192	0.1263	0.32424	0.25578	0.29368	0.58002	charset short_introns
1	prum-alignment-L1.longname.annotEB.wCODON.nex											CHARSET Intron1	1 - 81;
1	prum-alignment-L1.longname.annotEB.wCODON.nex											CHARSET Intron2	1484 - 1594;
10	prum-alignment-L10.longname.annotEB.wCODON.nex											CHARSET Intron1	1 - 220;
10	prum-alignment-L10.longname.annotEB.wCODON.nex											CHARSET Intron2	1022 - 1193;
34	prum-alignment-L34.longname.annotEB.wCODON.nex											CHARSET Intron1	1 - 13;
34	prum-alignment-L34.longname.annotEB.wCODON.nex											CHARSET Intron2	1531 - 1617;
36	prum-alignment-L36.longname.annotEB.wCODON.nex											CHARSET Intron1	1 - 330;
36	prum-alignment-L36.longname.annotEB.wCODON.nex											CHARSET Intron2	1132 - 1349;
48	prum-alignment-L48.longname.annotEB.wCODON.nex											CHARSET Intron1	1 - 92;
48	prum-alignment-L48.longname.annotEB.wCODON.nex											CHARSET Intron2	1488 - 1618;
51	prum-alignment-L51.longname.annotEB.wCODON.nex											CHARSET Intron1	1 - 150;
51	prum-alignment-L51.longname.annotEB.wCODON.nex											CHARSET Intron2	430 - 609;
63	prum-alignment-L63.longname.annotEB.wCODON.nex											CHARSET Intron1	44 - 146;
63	prum-alignment-L63.longname.annotEB.wCODON.nex											CHARSET Intron2	438 - 531;
63	prum-alignment-L63.longname.annotEB.wCODON.nex											CHARSET Intron3	820 - 988;
63	prum-alignment-L63.longname.annotEB.wCODON.nex											CHARSET Intron4	1580 - 1639;
65	prum-alignment-L65.longname.annotEB.wCODON.nex											CHARSET Intron1	1 - 68;
65	prum-alignment-L65.longname.annotEB.wCODON.nex											CHARSET Intron2	357 - 499;
65	prum-alignment-L65.longname.annotEB.wCODON.nex											CHARSET Intron3	779 - 863;
65	prum-alignment-L65.longname.annotEB.wCODON.nex											CHARSET Intron4	1143 - 1240;
65	prum-alignment-L65.longname.annotEB.wCODON.nex											CHARSET Intron5	1520 - 1626;
67	prum-alignment-L67.longname.annotEB.wCODON.nex											CHARSET Intron1	1 - 139;
67	prum-alignment-L67.longname.annotEB.wCODON.nex											CHARSET Intron2	419 - 559;
67	prum-alignment-L67.longname.annotEB.wCODON.nex											CHARSET Intron3	839 - 929;
67	prum-alignment-L67.longname.annotEB.wCODON.nex											CHARSET Intron4	1209 - 1330;
67	prum-alignment-L67.longname.annotEB.wCODON.nex											CHARSET Intron5	1619 - 1723;
74	prum-alignment-L74.longname.annotEB.wCODON.nex											CHARSET Intron1	1 - 230;
74	prum-alignment-L74.longname.annotEB.wCODON.nex											CHARSET Intron2	844 - 1095;
87	prum-alignment-L87.longname.annotEB.wCODON.nex											CHARSET Intron1	1 - 90;
87	prum-alignment-L87.longname.annotEB.wCODON.nex											CHARSET Intron2	1699 - 1802;
105	prum-alignment-L105.longname.annotEB.wCODON.nex											CHARSET Intron1	1 - 42;
105	prum-alignment-L105.longname.annotEB.wCODON.nex											CHARSET Intron2	1462 - 1463;
110	prum-alignment-L110.longname.annotEB.wCODON.nex											CHARSET Intron1	1 - 150;
110	prum-alignment-L110.longname.annotEB.wCODON.nex											CHARSET Intron2	1192 - 1372;
113	prum-alignment-L113.longname.annotEB.wCODON.nex											CHARSET Intron1	1 - 250;
113	prum-alignment-L113.longname.annotEB.wCODON.nex											CHARSET Intron2	1811 - 1957;
121	prum-alignment-L121.longname.annotEB.wCODON.nex											CHARSET Intron1	1 - 114;
121	prum-alignment-L121.longname.annotEB.wCODON.nex											CHARSET Intron2	1813 - 1937;
122	prum-alignment-L122.longname.annotEB.wCODON.nex											CHARSET Intron1	1 - 180;
122	prum-alignment-L122.longname.annotEB.wCODON.nex											CHARSET Intron2	1797 - 1946;
128	prum-alignment-L128.longname.annotEB.wCODON.nex											CHARSET Intron1	1 - 210;
128	prum-alignment-L128.longname.annotEB.wCODON.nex											CHARSET Intron2	1086 - 1319;
129	prum-alignment-L129.longname.annotEB.wCODON.nex											CHARSET Intron1	1 - 110;
129	prum-alignment-L129.longname.annotEB.wCODON.nex											CHARSET Intron2	1518 - 1645;
135	prum-alignment-L135.longname.annotEB.wCODON.nex											CHARSET Intron1	1 - 5;
135	prum-alignment-L135.longname.annotEB.wCODON.nex											CHARSET Intron2	1547 - 1628;
136	prum-alignment-L136.longname.annotEB.wCODON.nex											CHARSET Intron1	1 - 178;
136	prum-alignment-L136.longname.annotEB.wCODON.nex											CHARSET Intron2	1880 - 2058;
137	prum-alignment-L137.longname.annotEB.wCODON.nex											CHARSET Intron1	1 - 185;
137	prum-alignment-L137.longname.annotEB.wCODON.nex											CHARSET Intron2	1360 - 1537;
148	prum-alignment-L148.longname.annotEB.wCODON.nex											CHARSET Intron1	1 - 182;
148	prum-alignment-L148.longname.annotEB.wCODON.nex											CHARSET Intron2	1114 - 1329;
153	prum-alignment-L153.longname.annotEB.wCODON.nex											CHARSET Intron1	1 - 149;
153	prum-alignment-L153.longname.annotEB.wCODON.nex											CHARSET Intron2	943 - 1056;
153	prum-alignment-L153.longname.annotEB.wCODON.nex											CHARSET Intron3	1172 - 2103;
161	prum-alignment-L161.longname.annotEB.wCODON.nex											CHARSET Intron1	1 - 152;
161	prum-alignment-L161.longname.annotEB.wCODON.nex											CHARSET Intron2	1804 - 1964;
171	prum-alignment-L171.longname.annotEB.wCODON.nex											CHARSET Intron1	1 - 168;
171	prum-alignment-L171.longname.annotEB.wCODON.nex											CHARSET Intron2	1762 - 1990;
192	prum-alignment-L192.longname.annotEB.wCODON.nex											CHARSET Intron1	1 - 140;
192	prum-alignment-L192.longname.annotEB.wCODON.nex											CHARSET Intron2	1189 - 1360;
197	prum-alignment-L197.longname.annotEB.wCODON.nex											CHARSET Intron1	1 - 171;
197	prum-alignment-L197.longname.annotEB.wCODON.nex											CHARSET Intron2	1080 - 1261;
205	prum-alignment-L205.longname.annotEB.wCODON.nex											CHARSET Intron1	1 - 97;
205	prum-alignment-L205.longname.annotEB.wCODON.nex											CHARSET Intron2	1514 - 1687;
223	prum-alignment-L223.longname.annotEB.wCODON.nex											CHARSET Intron1	1 - 125;
223	prum-alignment-L223.longname.annotEB.wCODON.nex											CHARSET Intron2	288 - 377;
228	prum-alignment-L228.longname.annotEB.wCODON.nex											CHARSET Intron1	1 - 163;
228	prum-alignment-L228.longname.annotEB.wCODON.nex											CHARSET Intron2	1779 - 1832;
234	prum-alignment-L234.longname.annotEB.wCODON.nex											CHARSET Intron1	1 - 174;
234	prum-alignment-L234.longname.annotEB.wCODON.nex											CHARSET Intron2	1633 - 1685;
242	prum-alignment-L242.longname.annotEB.wCODON.nex											CHARSET Intron1	1 - 159;
242	prum-alignment-L242.longname.annotEB.wCODON.nex											CHARSET Intron2	1255 - 1400;
245	prum-alignment-L245.longname.annotEB.wCODON.nex											CHARSET Intron1	1 - 153;
245	prum-alignment-L245.longname.annotEB.wCODON.nex											CHARSET Intron2	1648 - 1779;
247	prum-alignment-L247.longname.annotEB.wCODON.nex											CHARSET Intron1	1 - 90;
247	prum-alignment-L247.longname.annotEB.wCODON.nex											CHARSET Intron2	1590 - 1606;
252	prum-alignment-L252.longname.annotEB.wCODON.nex											CHARSET Intron1	1 - 116;
252	prum-alignment-L252.longname.annotEB.wCODON.nex											CHARSET Intron2	1600 - 1655;
258	prum-alignment-L258.longname.annotEB.wCODON.nex											CHARSET Intron1	1 - 129;
258	prum-alignment-L258.longname.annotEB.wCODON.nex											CHARSET Intron2	1774 - 1867;
265	prum-alignment-L265.longname.annotEB.wCODON.nex											CHARSET Intron1	1 - 262;
265	prum-alignment-L265.longname.annotEB.wCODON.nex											CHARSET Intron2	387 - 539;
266	prum-alignment-L266.longname.annotEB.wCODON.nex											CHARSET Intron1	1 - 161;
266	prum-alignment-L266.longname.annotEB.wCODON.nex											CHARSET Intron2	1998 - 2186;
269	prum-alignment-L269.longname.annotEB.wCODON.nex											CHARSET Intron1	1 - 188;
269	prum-alignment-L269.longname.annotEB.wCODON.nex											CHARSET Intron2	1266 - 1398;
275	prum-alignment-L275.longname.annotEB.wCODON.nex											CHARSET Intron1	1 - 191;
275	prum-alignment-L275.longname.annotEB.wCODON.nex											CHARSET Intron2	251 - 565;
279	prum-alignment-L279.longname.annotEB.wCODON.nex											CHARSET Intron1	1 - 125;
279	prum-alignment-L279.longname.annotEB.wCODON.nex											CHARSET Intron2	730 - 866;
282	prum-alignment-L282.longname.annotEB.wCODON.nex											CHARSET Intron1	1 - 139;
282	prum-alignment-L282.longname.annotEB.wCODON.nex											CHARSET Intron2	1810 - 1944;
294	prum-alignment-L294.longname.annotEB.wCODON.nex											CHARSET Intron1	1 - 164;
294	prum-alignment-L294.longname.annotEB.wCODON.nex											CHARSET Intron2	1297 - 1473;
310	prum-alignment-L310.longname.annotEB.wCODON.nex											CHARSET Intron1	1 - 34;
310	prum-alignment-L310.longname.annotEB.wCODON.nex											CHARSET Intron2	1590 - 1680;
318	prum-alignment-L318.longname.annotEB.wCODON.nex											CHARSET Intron1	1 - 160;
318	prum-alignment-L318.longname.annotEB.wCODON.nex											CHARSET Intron2	1260 - 1430;
334	prum-alignment-L334.longname.annotEB.wCODON.nex											CHARSET Intron1	1 - 32;
334	prum-alignment-L334.longname.annotEB.wCODON.nex											CHARSET Intron2	1013 - 1168;

## Sheet: UTR
#	Filename	Multiple_UTRs	Introns_absent	NC_nchar	UTR_nchar	UTR_inf	piA	piC	piG	piT	%GC	Charset_Name	Charset
262	prum-alignment-L262.longname.annotEB.wCODON.nex			278	112	105	0.27027	0.14672	0.12379	0.45922	0.27051	CHARSET UTR	1471 - 1582;			Summary of GC content for long UTRs:
119	prum-alignment-L119.longname.annotEB.wCODON.nex		1	173	173	109	0.31479	0.10413	0.18441	0.39666	0.28854	CHARSET UTR	1414 - 1586;
77	prum-alignment-L77.longname.annotEB.wCODON.nex		1	390	390	246	0.33275	0.15052	0.14491	0.37182	0.29543	CHARSET UTR	947 - 1336;			Mean -->	0.40602
244	prum-alignment-L244.longname.annotEB.wCODON.nex			312	312	163	0.32382	0.15124	0.14429	0.38064	0.29553	CHARSET UTR	791 - 1102;
30	prum-alignment-L30.longname.annotEB.wCODON.nex		1	340	340	161	0.29372	0.14071	0.16845	0.39713	0.30916	CHARSET UTR	1344-1683;			Min -->	0.27051
41	prum-alignment-L41.longname.annotEB.wCODON.nex			170	124	105	0.39946	0.11818	0.19148	0.29087	0.30966	CHARSET UTR	1555 - 1678;			L Quart -->	0.349115
95	prum-alignment-L95.longname.annotEB.wCODON.nex			361	185	173	0.2973	0.15446	0.15875	0.38948	0.31321	CHARSET UTR	1270 - 1454;			Median -->	0.387225
152	prum-alignment-L152.longname.annotEB.wCODON.nex		1	369	369	45	0.29759	0.14222	0.17107	0.38911	0.31329	CHARSET UTR	1069 - 1437;			U Quart -->	0.450905
325	prum-alignment-L325.longname.annotEB.wCODON.nex		1	184	184	123	0.25557	0.12721	0.19097	0.42625	0.31818	CHARSET UTR	1 - 184;			Max -->	0.64873
288	prum-alignment-L288.longname.annotEB.wCODON.nex		1	117	117	88	0.43239	0.19846	0.12033	0.24881	0.31879	CHARSET UTR	1555 - 1671;
184	prum-alignment-L184.longname.annotEB.wCODON.nex		1	198	198	182	0.29801	0.13145	0.18864	0.38191	0.32009	CHARSET UTR	1391 - 1588;			IQ range -->	0.10179
104	prum-alignment-L104.longname.annotEB.wCODON.nex		1	172	172	166	0.3259	0.17144	0.14912	0.35354	0.32056	CHARSET UTR	1561 - 1732;
189	prum-alignment-L189.longname.annotEB.wCODON.nex	2	1	519	519	328	0.28129	0.16121	0.17045	0.38704	0.33166	CHARSET UTR	1 - 50 1425 - 1893;			Summary of UTR lengths:
91	prum-alignment-L91.longname.annotEB.wCODON.nex		1	58	58	58	0.47297	0.109	0.22372	0.19431	0.33272	CHARSET UTR	1684 - 1741;
261	prum-alignment-L261.longname.annotEB.wCODON.nex			437	239	39	0.24378	0.19248	0.14682	0.41693	0.3393	CHARSET UTR	1509 - 1747;			Mean -->	219.564
330	prum-alignment-L330.longname.annotEB.wCODON.nex		1	227	227	182	0.30978	0.17333	0.16799	0.3489	0.34132	CHARSET UTR	1415 - 1641;
321	prum-alignment-L321.longname.annotEB.wCODON.nex		1	243	243	97	0.30368	0.17688	0.1654	0.35404	0.34228	CHARSET UTR	1515 - 1757;			Min -->	1
79	prum-alignment-L79.longname.annotEB.wCODON.nex			308	141	134	0.30203	0.17503	0.16955	0.35338	0.34458	CHARSET UTR	1 - 141;			L Quart -->	113.25
347	prum-alignment-L347.longname.annotEB.wCODON.nex			491	313	160	0.34669	0.13322	0.2133	0.30679	0.34652	CHARSET UTR	1357 - 1669;			Median -->	175.5
260	prum-alignment-L260.longname.annotEB.wCODON.nex			596	472	25	0.27937	0.13975	0.20765	0.37323	0.3474	CHARSET UTR	1130 - 1601;			U Quart -->	403
82	prum-alignment-L82.longname.annotEB.wCODON.nex		1	594	594	317	0.28521	0.1678	0.18106	0.36594	0.34886	CHARSET UTR	1099 - 1692;			Max -->	1107
343	prum-alignment-L343.longname.annotEB.wCODON.nex			282	192	185	0.39605	0.16347	0.18641	0.25407	0.34988	CHARSET UTR	1201 - 1392;
88	prum-alignment-L88.longname.annotEB.wCODON.nex		1	458	458	318	0.29461	0.18245	0.17507	0.34787	0.35752	CHARSET UTR	1210 - 1667;
176	prum-alignment-L176.longname.annotEB.wCODON.nex			260	118	104	0.4108	0.19698	0.16066	0.23156	0.35764	CHARSET UTR	1795 - 1912;
44	prum-alignment-L44.longname.annotEB.wCODON.nex	2	1	157	157	138	0.33877	0.1731	0.18707	0.30106	0.36017	CHARSET UTR	1 - 148 1631 - 1639;
336	prum-alignment-L336.longname.annotEB.wCODON.nex			304	175	163	0.29269	0.17216	0.19138	0.34376	0.36354	CHARSET UTR	1277 - 1451;
319	prum-alignment-L319.longname.annotEB.wCODON.nex		1	104	104	94	0.29227	0.16524	0.19865	0.34383	0.36389	CHARSET UTR	1513 - 1616;
303	prum-alignment-L303.longname.annotEB.wCODON.nex		1	139	139	120	0.28119	0.16836	0.19694	0.3535	0.3653	CHARSET UTR	1 - 139;
27	prum-alignment-L27.longname.annotEB.wCODON.nex			182	53	51	0.23658	0.25023	0.11678	0.39641	0.36701	CHARSET UTR	1 - 53;
302	prum-alignment-L302.longname.annotEB.wCODON.nex		1	123	123	98	0.31194	0.18128	0.18616	0.32062	0.36744	CHARSET UTR	744 - 866;
118	prum-alignment-L118.longname.annotEB.wCODON.nex		1	680	510	471	0.32487	0.16968	0.19989	0.30555	0.36957	CHARSET UTR	1 - 510;
190	prum-alignment-L190.longname.annotEB.wCODON.nex			218	105	102	0.32548	0.1781	0.1943	0.30211	0.3724	CHARSET UTR	1557 - 1661;
143	prum-alignment-L143.longname.annotEB.wCODON.nex			1291	1107	724	0.29579	0.1617	0.21125	0.33126	0.37295	CHARSET UTR	482 - 1588;
86	prum-alignment-L86.longname.annotEB.wCODON.nex		1	207	207	173	0.29129	0.20043	0.17381	0.33447	0.37424	CHARSET UTR	1544 - 1750;
188	prum-alignment-L188.longname.annotEB.wCODON.nex			303	137	132	0.3061	0.18224	0.19525	0.31641	0.37749	CHARSET UTR	1400 - 1536;
331	prum-alignment-L331.longname.annotEB.wCODON.nex		1	95	95	88	0.32993	0.14348	0.23585	0.29074	0.37933	CHARSET UTR	1106 - 1200;
141	prum-alignment-L141.longname.annotEB.wCODON.nex			474	284	250	0.33189	0.15044	0.22969	0.28798	0.38013	CHARSET UTR	922 - 1205;
231	prum-alignment-L231.longname.annotEB.wCODON.nex			687	526	280	0.32394	0.16484	0.21715	0.29407	0.38199	CHARSET UTR	985 - 1510;
103	prum-alignment-L103.longname.annotEB.wCODON.nex			298	146	84	0.28768	0.19008	0.1943	0.32793	0.38438	CHARSET UTR	1544 - 1689;
38	prum-alignment-L38.longname.annotEB.wCODON.nex			208	78	65	0.37282	0.219	0.16576	0.24242	0.38476	CHARSET UTR	1 - 78;
99	prum-alignment-L99.longname.annotEB.wCODON.nex		1	148	148	131	0.30041	0.18552	0.20086	0.31322	0.38638	CHARSET UTR	1565 - 1712; [NOTE: dataset has 1 intronic site; not included in intronic dataset]
182	prum-alignment-L182.longname.annotEB.wCODON.nex			1027	911	651	0.32617	0.1755	0.21257	0.28576	0.38807	CHARSET UTR	1082 - 1992;
73	prum-alignment-L73.longname.annotEB.wCODON.nex	2	1	287	287	278	0.28004	0.21227	0.18834	0.31935	0.40061	CHARSET UTR	1 - 162 1216 - 1340;
57	prum-alignment-L57.longname.annotEB.wCODON.nex			671	482	298	0.24534	0.22868	0.17237	0.35361	0.40105	CHARSET UTR	1 - 482;
43	prum-alignment-L43.longname.annotEB.wCODON.nex	2	1	191	191	176	0.33671	0.21128	0.19581	0.2562	0.40709	CHARSET UTR	1 - 153 1618 - 1655;
162	prum-alignment-L162.longname.annotEB.wCODON.nex			355	171	118	0.24632	0.17259	0.23588	0.34521	0.40847	CHARSET UTR	1 - 171;
28	prum-alignment-L28.longname.annotEB.wCODON.nex			346	160	126	0.30008	0.19617	0.21247	0.29127	0.40864	CHARSET UTR	1447 - 1606;
213	prum-alignment-L213.longname.annotEB.wCODON.nex			420	199	134	0.28297	0.18851	0.22174	0.30678	0.41025	CHARSET UTR	2118 - 2316;
235	prum-alignment-L235.longname.annotEB.wCODON.nex			299	154	54	0.23869	0.15705	0.25501	0.34925	0.41206	CHARSET UTR	1543 - 1696;
209	prum-alignment-L209.longname.annotEB.wCODON.nex			464	284	236	0.27242	0.19374	0.21973	0.31411	0.41347	CHARSET UTR	1 - 284;
39	prum-alignment-L39.longname.annotEB.wCODON.nex		1	87	87	77	0.37056	0.0664	0.34811	0.21493	0.41451	CHARSET UTR	1553 - 1639;
281	prum-alignment-L281.longname.annotEB.wCODON.nex			422	244	133	0.30562	0.17185	0.24436	0.27818	0.41621	CHARSET UTR	1483 - 1726;
250	prum-alignment-L250.longname.annotEB.wCODON.nex			351	174	112	0.27526	0.18121	0.23562	0.30791	0.41683	CHARSET UTR	1354 - 1527;
249	prum-alignment-L249.longname.annotEB.wCODON.nex			214	132	79	0.25387	0.23839	0.18878	0.31896	0.42717	CHARSET UTR	856 - 987;
253	prum-alignment-L253.longname.annotEB.wCODON.nex	2	1	339	339	281	0.26588	0.18626	0.24234	0.30552	0.4286	CHARSET UTR	1 - 154 1160 - 1344;
277	prum-alignment-L277.longname.annotEB.wCODON.nex			450	191	189	0.2828	0.17447	0.26572	0.27701	0.44019	CHARSET UTR	958 - 1148;
340	prum-alignment-L340.longname.annotEB.wCODON.nex		1	104	104	101	0.10751	0.25413	0.18827	0.4501	0.4424	CHARSET UTR	1 - 104;
248	prum-alignment-L248.longname.annotEB.wCODON.nex			394	212	176	0.28135	0.19969	0.24341	0.27555	0.4431	CHARSET UTR	1337 - 1548;
8	prum-alignment-L8.longname.annotEB.wCODON.nex	2	1	556	556	263	0.29168	0.18793	0.25873	0.26166	0.44666	CHARSET UTR	1-77 1011-1489;
169	prum-alignment-L169.longname.annotEB.wCODON.nex	2	1	670	670	296	0.26975	0.20433	0.24596	0.27996	0.45029	CHARSET UTR	1 - 340 1454 - 1783;
78	prum-alignment-L78.longname.annotEB.wCODON.nex	2	1	181	181	172	0.23062	0.25971	0.19112	0.31854	0.45083	CHARSET UTR	1 - 91 1187- 1276;
225	prum-alignment-L225.longname.annotEB.wCODON.nex			397	192	107	0.29277	0.20658	0.24435	0.2563	0.45093	CHARSET UTR	780 - 971;
264	prum-alignment-L264.longname.annotEB.wCODON.nex		1	144	144	83	0.13837	0.2388	0.21244	0.41039	0.45124	CHARSET UTR	1 - 144;
229	prum-alignment-L229.longname.annotEB.wCODON.nex			484	312	251	0.28867	0.1744	0.28032	0.25662	0.45472	CHARSET UTR	1293 - 1604;
12	prum-alignment-L12.longname.annotEB.wCODON.nex			319	202	162	0.28832	0.22305	0.23991	0.24872	0.46296	CHARSET UTR	1456 - 1657;
222	prum-alignment-L222.longname.annotEB.wCODON.nex			405	202	152	0.18548	0.2598	0.20551	0.34921	0.46531	CHARSET UTR	1466 - 1667;
120	prum-alignment-L120.longname.annotEB.wCODON.nex			388	186	127	0.24556	0.17623	0.29414	0.28407	0.47037	CHARSET UTR	1393 - 1578;
230	prum-alignment-L230.longname.annotEB.wCODON.nex			336	172	159	0.31616	0.17946	0.2918	0.21258	0.47126	CHARSET UTR	1494 - 1665;
195	prum-alignment-L195.longname.annotEB.wCODON.nex		1	186	186	175	0.23437	0.20296	0.26995	0.29272	0.47291	CHARSET UTR	1535 - 1720;
187	prum-alignment-L187.longname.annotEB.wCODON.nex			219	64	62	0.26477	0.27676	0.19702	0.26144	0.47378	CHARSET UTR	1606 - 1669;
165	prum-alignment-L165.longname.annotEB.wCODON.nex			856	796	486	0.20528	0.22262	0.25509	0.31701	0.47771	CHARSET UTR	1 - 796;
142	prum-alignment-L142.longname.annotEB.wCODON.nex		1	184	184	144	0.20916	0.18792	0.29436	0.30856	0.48228	CHARSET UTR	1545 - 1728;
204	prum-alignment-L204.longname.annotEB.wCODON.nex		1	176	176	154	0.25025	0.25033	0.23638	0.26304	0.48671	CHARSET UTR	1854 - 2029;
224	prum-alignment-L224.longname.annotEB.wCODON.nex			410	217	211	0.27326	0.27705	0.22508	0.2246	0.50213	CHARSET UTR	1055 - 1271;
206	prum-alignment-L206.longname.annotEB.wCODON.nex		1	96	96	76	0.21194	0.28212	0.24123	0.2647	0.52335	CHARSET UTR	1515 - 1610;
275	prum-alignment-L275.longname.annotEB.wCODON.nex			711	205	165	0.23325	0.21145	0.31388	0.24142	0.52533	CHARSET UTR	1007 - 1211;
72	prum-alignment-L72.longname.annotEB.wCODON.nex			177	162	154	0.22428	0.25357	0.29679	0.22536	0.55036	CHARSET UTR	1273 - 1434;
3	prum-alignment-L3.longname.annotEB.wCODON.nex			187	107	91	0.1917	0.17428	0.38278	0.25124	0.55706	CHARSET UTR	1530 -1636;
207	prum-alignment-L207.longname.annotEB.wCODON.nex			424	228	153	0.19075	0.23149	0.32862	0.24914	0.56011	CHARSET UTR	1 - 228;
307	prum-alignment-L307.longname.annotEB.wCODON.nex	2	1	233	233	228	0.25413	0.24816	0.33058	0.16713	0.57874	CHARSET UTR	1 - 117 1027 - 1142;
154	prum-alignment-L154.longname.annotEB.wCODON.nex		1	119	119	83	0.20863	0.3869	0.25061	0.15385	0.63751	CHARSET UTR	1 - 119;
126	prum-alignment-L126.longname.annotEB.wCODON.nex			268	120	119	0.19619	0.26984	0.37889	0.15509	0.64873	CHARSET UTR	1551 - 1670;
21	prum-alignment-L21.longname.annotEB.wCODON.nex			105	4	4	0.01799	0.01499	0.96102	0.006	0.97601	CHARSET UTR	887 - 890;
32	prum-alignment-L32.longname.annotEB.wCODON.nex			174	17	14	0.18347	0.41609	0.1892	0.21124	0.60529	CHARSET UTR	1396 - 1412;
89	prum-alignment-L89.longname.annotEB.wCODON.nex			218	39	18	0.05649	0.07722	0.32773	0.53856	0.40495	CHARSET UTR	1 - 39;
94	prum-alignment-L94.longname.annotEB.wCODON.nex			92	1	0	0.00602	0.00602	0.98795	0	0.99397	CHARSET UTR	1;
111	prum-alignment-L111.longname.annotEB.wCODON.nex		1	1	1	1	0.06587	0	0.93413	0	0.93413	CHARSET UTR	1338;
116	prum-alignment-L116.longname.annotEB.wCODON.nex	2	1	41	41	38	0.12798	0.27335	0.44066	0.15802	0.71401	CHARSET UTR	1 - 22 1361 - 1379;
125	prum-alignment-L125.longname.annotEB.wCODON.nex			140	32	31	0.33631	0.16302	0.33209	0.16858	0.49511	CHARSET UTR	1615 - 1646;
163	prum-alignment-L163.longname.annotEB.wCODON.nex			12	3	2	0.19838	0.66802	0.12955	0.00405	0.79757	CHARSET UTR	1 - 3;
271	prum-alignment-L271.longname.annotEB.wCODON.nex			175	39	38	0.14265	0.23773	0.14206	0.47756	0.37979	CHARSET UTR	1579 - 1617;
298	prum-alignment-L298.longname.annotEB.wCODON.nex		1	36	36	29	0.11695	0.36965	0.27359	0.2398	0.64324	CHARSET UTR	1 - 36;
301	prum-alignment-L301.longname.annotEB.wCODON.nex		1	31	31	28	0.13267	0.28488	0.45505	0.12741	0.73993	CHARSET UTR	692 - 722;
339	prum-alignment-L339.longname.annotEB.wCODON.nex			40	19	17	0.37899	0.05608	0.39855	0.16638	0.45463	CHARSET UTR	1283 - 1301;
	COMBINED SHORT UTR DATA				263		0.16203	0.23241	0.33357	0.27198	0.56598	CHARSET short_UTRs
8	prum-alignment-L8.longname.annotEB.wCODON.nex											CHARSET UTR_1	1 - 77;
8	prum-alignment-L8.longname.annotEB.wCODON.nex											CHARSET UTR_2	1011 - 1489;
43	prum-alignment-L43.longname.annotEB.wCODON.nex											CHARSET UTR_1	1 - 153;
43	prum-alignment-L43.longname.annotEB.wCODON.nex											CHARSET UTR_2	1618 - 1655;
44	prum-alignment-L44.longname.annotEB.wCODON.nex											CHARSET UTR_1	1 - 148;
44	prum-alignment-L44.longname.annotEB.wCODON.nex											CHARSET UTR_2	1631 - 1639;
73	prum-alignment-L73.longname.annotEB.wCODON.nex											CHARSET UTR_2	1216 - 1340;
73	prum-alignment-L73.longname.annotEB.wCODON.nex											CHARSET UTR_1	1 - 162;
78	prum-alignment-L78.longname.annotEB.wCODON.nex											CHARSET UTR_1	1 - 91;
78	prum-alignment-L78.longname.annotEB.wCODON.nex											CHARSET UTR_2	1187- 1276;
116	prum-alignment-L116.longname.annotEB.wCODON.nex											CHARSET UTR_1	1 - 22;
116	prum-alignment-L116.longname.annotEB.wCODON.nex											CHARSET UTR_2	1361 - 1379;
169	prum-alignment-L169.longname.annotEB.wCODON.nex											CHARSET UTR_1	1 - 340;
169	prum-alignment-L169.longname.annotEB.wCODON.nex											CHARSET UTR_2	1454 - 1783;
189	prum-alignment-L189.longname.annotEB.wCODON.nex											CHARSET UTR_1	1 - 50;
189	prum-alignment-L189.longname.annotEB.wCODON.nex											CHARSET UTR_2	1425 - 1893;
253	prum-alignment-L253.longname.annotEB.wCODON.nex											CHARSET UTR_1	1 - 154;
253	prum-alignment-L253.longname.annotEB.wCODON.nex											CHARSET UTR_2	1160 - 1344;
307	prum-alignment-L307.longname.annotEB.wCODON.nex											CHARSET UTR_1	1 - 117;
307	prum-alignment-L307.longname.annotEB.wCODON.nex											CHARSET UTR_2	1027 - 1142;

## Sheet: Intergenic
#	Filename	Charset_Name	Sites	piA	piC	piG	piT	%GC	Charset_Name	Charset
115	prum-alignment-L115.longname.annotEB.noncoding.nex	CHARSET Intergenic	733	0.30183	0.20503	0.20924	0.2839	0.41427	CHARSET Intergenic	1 - 733; [ locus name = non-coding_segment_in_intergenic_region_between_IRX2_and_LOC101747569 ]
214	prum-alignment-L214.longname.annotEB.noncoding.nex	CHARSET Intergenic	1628	0.32091	0.19642	0.22439	0.25828	0.42081	CHARSET Intergenic	1 - 1628; [ locus name = non-coding_segment_in_intergenic_region_between_uncharacterized_LOC101749271_and_uncharacterized_LOC107053753 ]
344	prum-alignment-L344.longname.annotEB.noncoding.nex	CHARSET Intergenic	960	0.29401	0.18908	0.21384	0.30307	0.40292	CHARSET Intergenic	1 - 960; [ locus name = non-coding_segment_in_intergenic_region_between_ARX_and_POLA1 ]
